# **Tex19.1 Regulates Acetylated SMC3 Cohesin and Prevents Aneuploidy in Mouse Oocytes**

Judith Reichmann <sup>1,§,†</sup>, Karen Dobie <sup>1,§</sup>, Lisa M. Lister <sup>2</sup>, Diana Best <sup>1</sup>, James H. Crichton <sup>1</sup>, Marie  
5 MacLennan <sup>1</sup>, David Read <sup>1</sup>, Eleanor S. Raymond <sup>1</sup>, Chao-Chun Hung <sup>1</sup>, Shelagh Boyle <sup>1</sup>, Katsuhiko  
Shirahige <sup>4</sup>, Howard J. Cooke <sup>1</sup>, Wendy A. Bickmore <sup>1</sup>, Mary Herbert <sup>2,3</sup>, and Ian R. Adams <sup>1,\*</sup>

<sup>1</sup> MRC Human Genetics Unit, MRC Institute of Genetics and Molecular Medicine, University of  
Edinburgh, Western General Hospital, Crewe Road, Edinburgh, EH4 2XU, United Kingdom.

10 <sup>2</sup> Institute for Genetic Medicine, Newcastle University, Biomedicine West Wing, Centre for Life,  
Times Square, Newcastle upon Tyne, NE1 3BZ, United Kingdom.

<sup>3</sup> Newcastle Fertility Centre, Biomedicine West Wing, Centre for Life, Times Square, Newcastle  
upon Tyne, NE1 4EP, United Kingdom.

<sup>4</sup> Research Center for Epigenetic Disease, Institute of Molecular and Cellular Biosciences,  
15 University of Tokyo, 1-1-1, Yayoi, Bunkyo-ku, Tokyo 113-0032, Japan.

§ These authors contributed equally

† Present address: EMBL Heidelberg, Meyerhofstraße 1, 69117 Heidelberg, Germany.

20

\* Author for correspondence: [Ian.Adams@igmm.ed.ac.uk](mailto:Ian.Adams@igmm.ed.ac.uk)

Keywords: oocyte, meiosis, aneuploidy, TEX19.1, UBR2, cohesin

Running Title: Preventing Aneuploidy in Mouse Oocytes

## 25 **Abstract**

Age-dependent oocyte aneuploidy, a major cause of Down syndrome, is associated with declining sister chromatid cohesion in postnatal oocytes. Here we show that cohesion in postnatal mouse oocytes is regulated by *Tex19.1*. We show that *Tex19.1*<sup>-/-</sup> oocytes have defects in the maintenance of chiasmata, mis-segregate their chromosomes during meiosis, and transmit aneuploidies to the next  
30 generation. By reconstituting aspects of this pathway in mitotic somatic cells, we show that *Tex19.1* regulates an acetylated SMC3-marked subpopulation of cohesin by inhibiting the activity of the E3 ubiquitin ligase UBR2 towards specific substrates, and that UBR2 itself has a previously undescribed role in negatively regulating acetylated SMC3. Lastly, we show that acetylated SMC3 is associated with meiotic chromosome axes in oocytes, but that this is reduced in the absence of  
35 *Tex19.1*. These findings indicate that *Tex19.1* maintains acetylated SMC3 and sister chromatid cohesion in postnatal oocytes, and prevents aneuploidy in the female germline.

## Introduction

Chromosome mis-segregation in the mammalian germline can have severe consequences for the  
40 next generation as germline transmission of aneuploidy typically results in non-viable embryos and  
miscarriage, or clinical conditions such as Down Syndrome (Hassold and Hunt 2001; Nagaoka et al.  
2012). Aneuploidy arising from defects in meiotic chromosome segregation in the female germline  
is prevalent in human embryos and is strongly dependent on maternal age but, despite its prevalence  
and clinical relevance, the molecular basis for the high rate of aneuploidy in human oocytes remains  
45 poorly understood (Hassold and Hunt 2001; Herbert et al. 2015; MacLennan et al. 2015; Nagaoka et  
al. 2012).

Recent studies have correlated an age-dependent loss in cohesin with increased oocyte aneuploidy  
in the mouse (Chiang et al. 2010; Lister et al. 2010). Cohesin is a complex of four proteins  
50 (SMC1 $\alpha$ , SMC3, RAD21 and either STAG1 or STAG2 in mitotic cells) arranged in a ring-like  
structure that links DNA molecules and promotes cohesion between sister chromatids (Nasmyth and  
Haering 2009). Meiotic cells express additional meiosis-specific versions of some of these cohesin  
subunits (SMC1 $\beta$ , RAD21L and REC8, and STAG3) which are thought to replace their mitotic  
equivalents in the cohesin ring (McNicoll et al. 2013). In female meiosis, cohesin is loaded onto  
55 DNA during foetal oocyte development, and this pool of chromatin-associated cohesin persists  
during the oocytes' prolonged meiotic arrest, growth and maturation (Burkhardt et al. 2016;  
Revenkova et al. 2010; Tachibana-Konwalski et al. 2010). This foetally-loaded cohesin plays a  
crucial role in regulating meiotic chromosome segregation as it provides sister chromatid cohesion  
along chromosome arms that maintains chiasmata linking homologous chromosomes together until  
60 anaphase I. Foetally-loaded cohesin also provides centromeric sister chromatid cohesion that holds  
sister chromatids together until anaphase II (Hodges et al. 2005; Revenkova et al. 2004, 2010;  
Tachibana-Konwalski et al. 2010). Ageing mouse oocytes have reduced levels of REC8 associated

with their chromosomes (Chiang et al. 2010; Lister et al. 2010), which probably contributes to multiple phenotypes evident in ageing oocytes including reduced cohesion between sister  
65 centromeres, fewer and more terminally distributed chiasmata, univalent chromosomes at metaphase I, and lagging chromosomes during anaphase I (Chiang et al. 2010; Lister et al. 2010). Indeed, many of these features are also seen in the oocytes of mice carrying mutations in *Smc1 $\beta$*  (Hodges et al. 2005; Revenkova et al. 2004).

70 Interestingly, although REC8 become cytologically undetectable on meiotic chromosome arms in old mice, most chromosome bivalents remain intact suggesting that only a small proportion of chromosome-associated REC8 is required to mediate arm cohesion and maintain chiasmata (Chiang et al. 2010; Lister et al. 2010). Indeed, it is not clear how much cytologically detectable chromosome-associated REC8 is present in cohesin complexes in meiotic oocytes, or what  
75 proportion of chromosome-associated cohesin is mediating sister chromatid cohesion in these cells. There does appear to be some subfunctionalisation amongst the multiple meiotic cohesin complexes present in mouse spermatocytes suggesting that different cohesin complexes can be involved in distinct processes in some chromosomal regions (Biswas et al. 2013, 2016; Agostinho et al. 2016; Ishiguro et al. 2011, 2014). Moreover, in mitotic cells there is good evidence that cohesin has  
80 additional roles in transcriptional regulation in addition to its role in sister chromatid cohesion, possibly through mediating looping interactions between DNA strands from the same DNA molecule rather than cohesion between DNA molecules (Remeseiro et al. 2013). In mitotic cells sister chromatid cohesion is mediated by a small sub-population of chromosome-associated cohesin marked by acetylation of the SMC3 subunit (Nishiyama et al. 2010, 2013; Schmitz et al. 2007;  
85 Zhang et al. 2008). It is not clear whether sister chromatid cohesion in meiotic chromosomes also relies on an equivalent subpopulation in mammals. However, functional sister chromatid cohesion in oocytes appears to be established during foetal development (Burkhardt et al. 2016; Revenkova

et al. 2010; Tachibana-Konwalski et al. 2010) and maintaining sister chromatid cohesion during postnatal development is a major challenge for mammalian oocytes with pathophysiological implications for ageing, infertility and genetic disease (Herbert et al. 2015; MacLennan et al. 2015).

A number of elegant studies in simpler organisms have provided significant insight into the molecular mechanisms by which cohesin functions (Nasmyth and Haering 2009). However, if there is selective pressure to reduce the transmission of aneuploidy through the female germline then mammals may have evolved additional mechanisms to help maintain cohesin function during postnatal oocyte development. Here we report the identification and characterisation of a germline-specific pathway mediated by the germline genome defence gene *Tex19.1* that promotes sister chromatid cohesion in postnatal mouse oocytes, and prevents aneuploidy from arising in the female germline.

100

## Results

### Subfertility in *Tex19.1*<sup>-/-</sup> Females is Associated with Oocyte Aneuploidy

*Tex19.1* is a mammal-specific DNA methylation-sensitive germline genome defence gene whose expression is primarily restricted to germ cells, pluripotent cells and the hypomethylated component of the placenta (Hackett et al. 2012; Kuntz et al. 2008; Öllinger et al. 2008; Reichmann et al. 2013; Wang et al. 2001). *Tex19.1* mRNA is expressed in mouse oocytes during foetal, perinatal and post-natal development (Celebi et al. 2012), and this expression is reduced in germinal vesicle stage oocytes from older mice (Pan et al. 2008). We have previously reported that *Tex19.1*<sup>-/-</sup> females are subfertile on a mixed genetic background (Öllinger et al. 2008), however the mechanistic basis for this phenotype has not been established. To investigate the cause of the subfertility in *Tex19.1*<sup>-/-</sup> females we first confirmed that this phenotype is present after backcrossing to a C57BL/6 genetic background: C57BL/6 *Tex19.1*<sup>-/-</sup> females have a 33% reduction in mean litter size when mated to wild-type males (Figure 1A). Adult *Tex19.1*<sup>-/-</sup> females have grossly normal ovary histology (Supplementary Figure S1) and have a similar number of zygotes at E0.5 as *Tex19.1*<sup>+/-</sup> littermate controls (Figure 1B), suggesting that their reduced litter size is not caused by fewer oocytes completing oogenesis. As *Tex19.1*<sup>-/-</sup> male mice have defects in meiotic chromosome synapsis (Öllinger et al. 2008), we investigated whether the reduction in litter size in *Tex19.1*<sup>-/-</sup> females might reflect meiosis-derived aneuploidies impairing oocyte quality (Yuan et al. 2002). E0.5 zygotes isolated from *Tex19.1*<sup>-/-</sup> females had no obvious morphological abnormalities (Figure 1C), but chromosome spreads revealed a significant increase in the frequency of aneuploidy in zygotes obtained from *Tex19.1*<sup>-/-</sup> females compared to those from *Tex19.1*<sup>+/-</sup> controls (Figure 1D,E). The low level hypoploidy in zygotes from *Tex19.1*<sup>+/-</sup> females likely represents technical artefacts arising from chromosomes loss during preparation of the chromosome spreads as hyperploidy was never seen in these samples. In contrast, both hypoploidy and hyperploidy were observed in zygotes from *Tex19.1*<sup>-/-</sup> females (Figure 1D,E). The increased aneuploidy in zygotes from *Tex19.1*<sup>-/-</sup> mothers

therefore likely reflects a biological defect in chromosome segregation in the developing female germline.

We confirmed that the aneuploidy in E0.5 zygotes from *Tex19.1*<sup>-/-</sup> females involves the maternal  
130 chromosomes by analysing parthenogenetically activated metaphase II oocytes induced to complete  
the second meiotic division in the absence of sperm. Aneuploid chromosome configurations were  
present more frequently in *Tex19.1*<sup>-/-</sup> anaphase II parthenogenetic oocytes than *Tex19.1*<sup>+/-</sup> controls  
(Figure 1F,G). The percentage of parthenogenetic anaphase II *Tex19.1*<sup>-/-</sup> oocytes containing  
aneuploid chromosome configurations (30%) is comparable to the percentage of aneuploid zygotes  
135 derived from *Tex19.1*<sup>-/-</sup> mothers (34%), and the reduction in litter size seen in *Tex19.1*<sup>-/-</sup> mothers  
(33%). As aneuploid mouse embryos typically do not develop to term (Yuan et al. 2002),  
transmission of aneuploidies through the female germline is likely a major contributor to the  
subfertility in *Tex19.1*<sup>-/-</sup> females.

#### 140 ***Tex19.1* Prevents Homolog Mis-segregation and Premature Sister Chromatid Separation During Oocyte Meiosis I**

We next sought to determine why aneuploidy arises in *Tex19.1*<sup>-/-</sup> oocytes. *Tex19.1*<sup>-/-</sup> spermatocytes  
exhibit defects in meiotic chromosome synapsis, and those that progress through to metaphase I  
typically possess univalent chromosomes (Öllinger et al. 2008). However, E18.5 foetal *Tex19.1*<sup>-/-</sup>  
145 oocytes showed no significant difference from *Tex19.1*<sup>+/-</sup> controls in progression through the  
zygotene, pachytene and diplotene stages of the first meiotic prophase, or in the frequency of  
chromosome asynapsis at pachytene, suggesting that chromosome synapsis is not grossly impaired  
in *Tex19.1*<sup>-/-</sup> females (Supplementary Figure S1). Furthermore, the frequency of univalent  
chromosomes in prometaphase I adult oocytes 3 hours after germinal vesicle breakdown (GVBD)  
150 was not significantly different in the absence of *Tex19.1* (Supplementary Figure S1). Thus, the

aneuploidy in *Tex19.1*<sup>-/-</sup> oocytes does not appear to be a consequence of defects in homologous chromosome synapsis or the establishment of bivalents during meiotic prophase.

We next determined if errors in meiosis I chromosome segregation could be causing the aneuploidy  
155 in *Tex19.1*<sup>-/-</sup> oocytes. Live imaging of oocytes microinjected with histone H2B-RFP at the germinal vesicle stage showed that the duration of M phase, as assessed by the interval between GVBD and extrusion of the first polar body, is similar in *Tex19.1*<sup>+/+</sup> and *Tex19.1*<sup>-/-</sup> oocytes (Supplementary Figure S2). This suggests that the first meiotic division progresses with grossly normal kinetics in the absence of *Tex19.1*, and argues against the possibility of a defective spindle assembly  
160 checkpoint in these oocytes (Homer et al. 2005; McGuinness et al. 2009; Touati et al. 2015). However, lagging chromosomes were observed during anaphase I in around one third of *Tex19.1*<sup>-/-</sup> oocytes but not in control *Tex19.1*<sup>+/+</sup> oocytes (Figure 2A,B), indicating that meiosis I chromosome segregation may be perturbed. Consistent with this, meiotic chromosome spreads from metaphase II oocytes showed that aneuploidy was already present in around one third of *Tex19.1*<sup>-/-</sup> oocytes at this  
165 stage (Figure 2C,D). Lagging chromosomes during anaphase I and aneuploidy in metaphase II have previously been reported in mouse oocytes containing univalent chromosomes (Kouznetsova et al. 2007) and in association with age-related depletion of oocyte chromosomal cohesin (Chiang et al. 2010; Lister et al. 2010). Seven of the 21 aneuploid, and one of the 27 euploid, metaphase II oocytes from *Tex19.1*<sup>-/-</sup> females possessed at least one isolated sister chromatid (Figure 2C,D,  
170 Supplementary Figure S3) suggesting that premature sister chromatid separation is contributing to the aneuploidy in *Tex19.1*<sup>-/-</sup> oocytes. In addition, 5 of the 7 hyperploid *Tex19.1*<sup>-/-</sup> metaphase II oocytes had at least 21 dyads where sister chromatid cohesion appeared to be intact, possibly indicating mis-segregation of homologs (Figure 2C,D, Supplementary Figure S3). Homolog mis-segregation and premature sister chromatid separation during meiosis I both appear to be  
175 contributing to the aneuploidy in *Tex19.1*<sup>-/-</sup> oocytes.



## ***Tex19.1*<sup>-/-</sup> Oocytes Have Defects in Maintaining the Number and Position of Chiasmata During Postnatal Development**

Homolog mis-segregation and premature sister chromatid separation during meiosis I are suggestive  
180 of defects in sister chromatid cohesion. Foetal oocytes in mouse meiotic cohesin mutants have  
shortened chromosome axis length and reduced numbers of late recombination foci whereas adult  
oocytes have reduced numbers of chiasmata, increased terminalisation of chiasmata, univalent  
chromosomes, homolog mis-segregation, and premature sister chromatid separation (Hodges et al.  
2005; Novak et al. 2008; Revenkova et al. 2004; Tachibana-Konwalski et al. 2010). We therefore  
185 analysed the number and distribution of chiasmata in *Tex19.1*<sup>-/-</sup> oocytes, an indicator of sister  
chromatid cohesion along chromosome arms. Chiasmata counts from prometaphase I oocytes five  
hours after GVBD revealed that the number of chiasmata in *Tex19.1*<sup>-/-</sup> oocytes is significantly lower  
than in *Tex19.1*<sup>+/-</sup> littermate controls (Figure 3A,B). We observed one pair of univalent achiasmate  
chromosomes in *Tex19.1*<sup>-/-</sup> oocytes and none in *Tex19.1*<sup>+/-</sup> oocytes, but the reduction in chiasmata  
190 frequency is primarily caused by *Tex19.1*<sup>-/-</sup> oocytes having fewer bivalents with multiple chiasmata.  
(Figure 3E). To determine whether the reduction in chiasmata in *Tex19.1*<sup>-/-</sup> adult oocytes arises from  
defects in the establishment of meiotic crossovers during foetal development we analysed late  
recombination foci using immunostaining for MLH1 which is thought to mark around 90% of  
meiotic crossover events (Baker et al. 1996; Holloway et al. 2008). The number of MLH1 foci in  
195 foetal *Tex19.1*<sup>-/-</sup> oocytes is not significantly different from littermate controls (Figure 3C,D),  
suggesting that either *Tex19.1* primarily affects the generation of MLH1-independent crossovers  
(Holloway et al. 2008), or meiotic crossovers are established correctly in foetal *Tex19.1*<sup>-/-</sup> oocytes  
but are not maintained correctly during postnatal oocyte development.

200 We next analysed whether loss of *Tex19.1* might affect the positioning of chiasmata along the

chromosome axis, as has been reported in ageing oocytes (Henderson and Edwards 1968) and in *Smc1 $\beta$ <sup>-/-</sup>* female mice (Hodges et al. 2005). Centromeres in prometaphase I oocyte spreads were labelled using anti-centromeric antibodies (ACA), and chiasmata in bivalents with a single chiasma classified as being proximal, interstitial, distal relative to the centromere. Bivalents that were associated in an end-to-end configuration (Figure 3A, arrows) were classified as having terminal chiasmata for consistency with previous reports (Henderson and Edwards 1968). Loss of *Tex19.1* resulted in significant increase in the proportion of these terminal chiasmata (Figure 3F), similar to *Smc1 $\beta$ <sup>-/-</sup>* and ageing oocytes (Henderson and Edwards 1968; Hodges et al. 2005). In contrast, the positioning of MLH1 foci in foetal oocytes was not affected by the loss of *Tex19.1* (Figure 3G). Moreover, while loss of *Tex19.1* causes some phenotypic similarity with adult *Smc1 $\beta$ <sup>-/-</sup>* oocytes, foetal phenotypes such as fewer MLH1 foci (Figure 3G) and altered chromosome axis length (Supplementary Figure S3) were not observed. This suggests that loss of *Tex19.1* impairs maintenance rather than establishment of chiasmata. As maintenance of chiasmata in post-natal oocytes is mediated by sister chromatid cohesion in chromosome arms (Hodges et al. 2005; Tachibana-Konwalski et al. 2010), the reduction in chiasmata frequency in combination with the increased terminalisation of remaining chiasmata strongly indicates that *Tex19.1* has a role in the maintenance of arm cohesion in postnatal oocytes.

Ageing mouse oocytes exhibit defects in centromeric cohesion in addition to impaired arm cohesion (Chiang et al. 2010; Lister et al. 2010). As arm cohesion and centromeric cohesion are differentially regulated in meiosis I, the impaired maintenance of arm cohesion seen in *Tex19.1<sup>-/-</sup>* oocytes does not necessarily reflect the behaviour of centromeric cohesion. Therefore, we tested whether centromeric cohesion is also weakened in *Tex19.1<sup>-/-</sup>* oocytes by measuring the distance between sister centromeres during prometaphase I. Interestingly, sister centromere separation is not detectably altered in *Tex19.1<sup>-/-</sup>* oocytes (Figure 3H,I) suggesting that centromeric cohesion may not be

impaired. Therefore, while *Tex19.1*<sup>-/-</sup> oocytes show some similarity to ageing mouse oocytes with respect to loss of arm cohesion, this may not extend to loss of centromeric cohesion. Recent high resolution live imaging studies on ageing oocytes suggest that bivalent with weakened arm cohesion precociously resolve they interact with the spindle during prometaphase I generating transient univalents chromosomes (Zielinska et al. 2015; Sakakibara et al. 2015). Univalent chromosomes variably bi-orient on the meiosis I spindle and prematurely separate into sisters, or reductionally segregate homologs independently to one or other daughter cell, and therefore exhibit a mixture of homolog mis-segregation and premature sister chromatid separation patterns (Kouznetsova et al. 2007; LeMaire-Adkins et al. 1997). Thus, loss of *Tex19.1* selectively impairs maintenance of arm cohesion in meiotic oocytes, which could be sufficient to cause the combination of homolog mis-segregation and premature separation of sister chromatids and aneuploidy seen in these oocytes.

### **Ectopic Expression of *TEX19* Promotes Sister Chromatid Cohesion in Mitotic Somatic Cells**

Although the phenotypic analysis of *Tex19.1*<sup>-/-</sup> oocytes indicates that *Tex19.1* plays a role in preventing aneuploidy and maintaining arm cohesion in postnatal oocytes, the biochemical function of this protein is poorly understood. *TEX19.1* is mammal-specific protein that contains no functionally annotated protein domains or motifs, and the limited availability of mammalian oocyte material restricts untargeted approaches to determine how this protein regulates arm cohesion. To circumvent this limitation we tested whether ectopic expression of *Tex19.1* might affect sister chromatid cohesion in somatic cells that do not normally express this gene. *Tex19.1* expression is primarily and causally regulated by DNA methylation, and although it is normally silenced by promoter DNA methylation in somatic cells, it is activated in response to DNA hypomethylation and may be functional in somatic cells in this context (Hackett et al. 2012).

250

Cohesins are loaded onto chromatin during S phase and removed during M phase in mitotic somatic cells (Hauf et al. 2001; Waizenegger et al. 2000), therefore we used a double thymidine block and release to enrich HEK293T human embryonic kidney cells in G2/M. Human *TEX19* is not expressed in somatic HEK293T cells, but can be ectopically expressed in these cells by transfection  
255 (Supplementary Figure S4). Flow cytometry suggests that expression of human *TEX19* does not grossly affect cell cycle progression (Supplementary Figure S4). Interestingly, ectopic expression of *TEX19* in these cells reduces sister chromatid separation in G2/M (Figure 4A,B) suggesting that arm cohesion could be enhanced. Although the magnitude of the effect on sister chromatid separation is relatively small, mitotic cells spend much less time in G2/M than postnatal mouse  
260 oocytes where loss of *Tex19.1* has significant phenotypic consequences. Thus, the *Tex19.1*-dependent mechanism promoting maintenance of cohesion in post-natal meiotic oocytes can be reconstituted to some extent by expressing *TEX19* in mitotic somatic cells.

We next investigated how *TEX19* might be regulating cohesion in this experimental system.  
265 Western blots on chromatin isolated from G2/M-enriched HEK293T cells showed that the increased sister chromatid separation is not accompanied by a detectable statistically significant increase in any of the four core cohesin subunits: SMC1, SMC3, RAD21 or SA2 (Figure 4C,D). This finding bears some resemblance to observations in sororin knock-down cells which can also affect sister chromatid cohesion without detectably altering the bulk population of cohesin associated with  
270 chromatin (Schmitz et al. 2007). Sororin regulates sister chromatid cohesion through protecting the small subpopulation of chromatin-associated cohesin that mediates sister chromatid cohesion (Nishiyama et al. 2010, 2013; Schmitz et al. 2007; Ladurner et al. 2016; Zhang et al. 2008). We therefore tested whether this subpopulation of cohesin, which is marked by acetylation of the SMC3 subunit, might be regulated by *TEX19*. Interestingly, Western blots using antibodies previously  
275 shown to be specific for AcSMC3 (Nishiyama et al. 2010) showed that the abundance of this

modified cohesin subunit is elevated ~3-fold in G2/M chromatin in response to *TEX19* expression (Figure 4C,D). The *TEX19*-dependent increase in chromatin-associated AcSMC3 is not accompanied by a detectable change in the total amount of SMC3 associated with chromatin (Figure 4C,D) or in the total amount of AcSMC3 in the cell (Supplementary Figure S4). Thus, 280 *TEX19* appears to specifically regulate an AcSMC3-containing chromatin-associated subpopulation of cohesin. The increase in AcSMC3 abundance in response to *TEX19* expression potentially reflects increased abundance of the subpopulation of cohesin that mediates sister chromatid cohesion, and correlates with the reduced sister chromatid separation in these cells.

285 SMC3 is acetylated during S phase by ESCO1 and/or ESCO2 to establish sister chromatid cohesion, and deacetylated by HDAC8 once it has been dissociated from the chromosomes (Deardorff et al. 2012; Minamino et al. 2015; Zhang et al. 2008; Ladurner et al. 2016). To test whether *TEX19* is affecting the establishment or maintenance of AcSMC3 in this experimental system we analysed cohesin subunits in chromatin from HEK293T cells enriched in S-phase 290 (Supplementary Figure S4). In contrast to G2/M cells, expression of *TEX19* does not detectably affect the amount of chromatin-associated AcSMC3 in cells enriched for S phase (Supplementary Figure S4) suggesting that *TEX19* is not strongly influencing establishment of SMC3 acetylation during S phase (Ladurner et al. 2016; Zhang et al. 2008). Taken together, these data suggest that expression of *TEX19* promotes maintenance of a chromatin-associated subpopulation of cohesin 295 marked by AcSMC3 during G2/M phases of the cell cycle. The findings from the HEK293T experimental system bear a striking resemblance to the findings from analysis of the *Tex19.1*<sup>-/-</sup> oocyte phenotype.

### **TEX19.1 Inhibits the Activity of E3 Ubiquitin Ligase UBR2 Towards Some Substrates**

300 To investigate how expression of *TEX19* might affect AcSMC3 and sister chromatid cohesion we

next identified proteins that interact with TEX19.1 when expressed in mitotic somatic cells by performing mass spectrometry on TEX19.1-YFP protein complexes isolated from stable HEK293 cell lines. TEX19.1-YFP formed a stoichiometric complex with a ~200 kD protein that was identified by mass spectrometry as the E3 ubiquitin ligase UBR2 (Figure 5A). UBR2 has previously  
305 been identified as co-immunoprecipitating with TEX19.1 from testes (Yang et al. 2010), suggesting that this interaction reflects the behaviour of endogenously expressed proteins in the mammalian germline. Western blotting confirmed that endogenous UBR2 is present in TEX19.1-YFP immunoprecipitates (Figure 5B). The stoichiometry of the UBR2:TEX19.1-YFP complex that we isolated suggested that TEX19.1 could represent a regulatory subunit rather than a substrate of  
310 UBR2.

UBR2 functions in the N-end rule pathway that degrades proteins depending on their N-terminal amino acids. Proteins with a basic (type I) residue, a large hydrophobic (type II) residue, or a methionine residue followed by a large hydrophobic residue (Met- $\Phi$  motif) at their N-terminus are  
315 all degraded by the N-end rule pathway (Kim et al. 2014; Tasaki et al. 2005). We therefore used ubiquitin-GFP fusion proteins that are processed by ubiquitin hydrolyases to generate GFP moieties possessing N-terminal methionine (M-GFP), N-terminal arginine (R-GFP, type I), N-terminal leucine (L-GFP, type II), or a non-cleavable ubiquitin fusion degradation signal control (Ub-GFP) at their N-termini (Dantuma et al. 2000) to test the effect of TEX19.1 on the N-end rule pathway. The  
320 abundance of GFP in Flp-In-293 cell lines stably expressing M-GFP, R-GFP, L-GFP or Ub-GFP from the same chromosomal locus was determined by the N-terminal amino acid and was sensitive to the proteasome inhibitor MG132 (Figure 5C,D, Supplementary Figure S5). Consistent with previous observations, R-GFP is more unstable than L-GFP and represents a more sensitive reporter for N-end rule degradation (Dantuma et al. 2000). Transient transfection of *Tex19.1* into these N-  
325 end rule reporter cell lines resulted in a ~50% increase in L-GFP fluorescence but did not affect the

more sensitive R-GFP reporter, or the Ub-GFP control substrate (Figure 5C,D). This suggests that TEX19.1 primarily regulates the stability of type II N-end rule substrates. Human *TEX19* had a similar effect on L-GFP abundance, and also had a minor effect on R-GFP abundance in this assay (Supplementary Figure S5). The increase in L-GFP fluorescence in response to ectopic expression of *Tex19.1* in this system represents increased abundance of L-GFP protein (Figure 5D), indicating that *Tex19.1* is inhibiting turnover of type II N-end rule substrates. The stronger effect on type II N-end rule substrates is consistent with TEX19.1 inhibiting UBR2 as UBR2 primarily binds to type II but not type I substrates in vivo (Tasaki et al. 2005).

We next investigated whether *Tex19.1*-dependent stabilisation of type II N-end rule substrates might reflect TEX19.1 directly inhibiting UBR2 binding to N-end rule substrates. We used N-end rule peptides (Tasaki et al. 2005) coupled to agarose beads to pull down endogenous UBR2 from HEK293T cells in the presence or absence of TEX19.1. Consistent with previous studies (Tasaki et al. 2005), endogenous UBR2 bound to type II N-end rule peptides, but not type I peptides or control peptides (Figure 5E). Furthermore, ectopic expression of *Tex19.1* decreased the amount of UBR2 bound to type II N-end rule peptides (Figure 5E). Taken together, these data indicate that TEX19.1 is able to assemble into a stable stoichiometric complex with the E3 ubiquitin ligase UBR2, inhibit its binding to type II N-end rule peptides, and stabilise type II N-end rule substrates.

### 345 ***Ubr2* Negatively Regulates Levels of Chromatin-Associated AcSMC3**

The data in the previous section suggests that, mechanistically, TEX19.1 functions at least in part through inhibiting the activity of UBR2 towards type II N-end rule substrates. However neither ubiquitin-dependent proteolysis nor UBR2 have previously been implicated in regulating AcSMC3. We therefore tested whether *TEX19* requires a functional proteasome to regulate chromatin-associated AcSMC3. HEK293T cells transiently transfected with *TEX19* were treated with the

proteasome inhibitor MG132, which arrests cells in M phase with high levels of sister chromatid cohesion (Nakajima et al. 2007). MG132-treatment abolishes the ability of *TEX19* to increase the amount of chromatin-associated AcSMC3 (Figure 6A,B), suggesting that a functional proteasome is required for *TEX19* to regulate AcSMC3 cohesin. Thus, the biochemical function that we have identified for *TEX19* in regulating N-end rule degradation may be mechanistically relevant for the regulation of AcSMC3.

We next tested if UBR2 itself might have a previously undescribed role in regulating AcSMC3. *Ubr2*<sup>-/-</sup> fibroblasts exhibit chromosomal fragility, defects in DNA repair and chromosome segregation errors during mitosis in culture (Ouyang et al. 2006), and our attempts to generate mutations in *Ubr2* by CRISPR/Cas9-mediated genome editing in HEK293T cells suggest that this gene is required for normal growth and proliferation in this cell type. *Ubr2*<sup>-/-</sup> mutant mice exhibit female embryonic lethality and male infertility, but are otherwise grossly phenotypically normal (Kwon et al. 2003). However the female lethality and male infertility complicates analysis of meiotic cohesin in *Ubr2*<sup>-/-</sup> germ cells. Furthermore, *Ubr2* is required for TEX19.1 protein stability (Yang et al. 2010), and *Ubr2*<sup>-/-</sup> males therefore phenocopy multiple aspects of the meiotic defects in *Tex19.1*<sup>-/-</sup> spermatocytes (Crichton et al. 2017). Therefore analysis of *Ubr2*<sup>-/-</sup> germ cells would not distinguish between *Ubr2* regulating AcSMC3 and *Ubr2* stabilising TEX19.1 which then regulates AcSMC3 through a different mechanism. However, as the development and function of somatic tissues is relatively unperturbed in postnatal *Ubr2*<sup>-/-</sup> mice (Kwon et al. 2003), we generated *Ubr2*<sup>-/-</sup> mice to allow us to assess the role of *Ubr2* in regulating AcSMC3 in somatic tissues where there is no confounding *Tex19.1* expression. Histology and flow cytometry of adult spleen, a rapidly proliferating tissue containing a relatively high proportion of cells in G2/M, showed no obvious differences in cell composition or cell cycle distribution in the absence of *Ubr2* (Supplementary Figure S6). However, the amount of chromatin-associated AcSMC3 is ~2-fold higher in spleen from



*Ubr2*<sup>-/-</sup> mice relative to controls (Figure 6C,D). This effect is primarily restricted to AcSMC3, while total SMC3, SMC1, RAD21 and SA2 cohesin subunits were not affected by loss of *Ubr2* (Figure 6C,D). Thus loss of *Ubr2* in this proliferating somatic tissue phenocopies ectopic expression of *TEX19* in cultured somatic cells. The amount of chromatin-associated AcSMC3 is not detectably  
380 affected by loss of *Ubr2* in the thymus (Supplementary Figure S7) suggesting that the relative contribution of *Ubr2* to AcSMC3 regulation varies in different tissues, which could potentially reflect redundancy between different UBR proteins (Tasaki et al. 2005). Nevertheless, *Ubr2* appears to have a previously undescribed role in regulating AcSMC3. The ability of TEX19.1 to inhibit UBR2-dependent degradation of N-end rule substrates appears to be mechanistically relevant to its  
385 role in regulating AcSMC3-containing cohesin.

### ***Tex19.1*<sup>-/-</sup> Oocytes Have Reduced Levels of Chromosome-Associated Acetylated SMC3 Cohesin**

We next tested whether the ability of *Tex19.1* to regulate the AcSMC3-marked subpopulation of  
390 cohesin that mediates sister chromatid cohesion might explain the defects in arm cohesion seen in postnatal *Tex19.1*<sup>-/-</sup> oocytes. However, although the existence and cohesive function of a AcSMC3-marked subpopulation cohesin is well established in mitotic cells, it is not clear whether this subpopulation of cohesin exists in meiotic oocyte chromosomes, or if it has a role in sister chromatid cohesion. We therefore performed immunostaining for REC8, a meiotic kleisin subunit  
395 of cohesin, and for AcSMC3 in prometaphase I chromosomes from *Tex19.1*<sup>+/-</sup> control and *Tex19.1*<sup>-/-</sup> knockout oocytes. As previously reported for this REC8 antibody (Lister et al. 2010), anti-REC8 staining is primarily located on chromosome axes between sister chromatids in prometaphase I oocyte chromosomes from control mice (Figure 7A). However, we could not detect any change in the abundance or distribution of anti-REC8 immunostaining in chromosomes from *Tex19.1*<sup>-/-</sup>  
400 oocytes (Figure 7A,B). This finding is consistent with there being no detectable effect of *TEX19*

expression on the amount of the RAD21 mitotic kleisin subunit in HEK293T cells (Figure 4C,D).  
Moreover, analogously to the sororin knockdown phenotype in mitotic cells (Schmitz et al. 2007),  
this finding suggests that arm cohesion in meiotic oocyte chromosomes can be impaired without  
affecting the bulk REC8-containing cohesin population, and is consistent with cohesion in meiotic  
405 chromosomes being mediated by a specific, small subpopulation of cohesin.

In contrast to REC8, anti-AcSMC3 immunostaining showed a significant ~2-fold reduction in  
prometaphase I chromosomes isolated from *Tex19.1*<sup>-/-</sup> oocytes (Figure 7C,D). AcSMC3 localisation  
in meiotic oocyte chromosomes has not been previously reported and, consistent with  
410 immunostaining for other cohesin subunits in prometaphase I chromosomes (Lister et al. 2010;  
Chiang et al. 2010; Hodges et al. 2005), anti-AcSMC3 immunostaining is located along  
chromosome axes between sister chromatids (Figure 7C). Moreover, the decrease in anti-AcSMC3  
immunostaining of prometaphase I chromosomes isolated from *Tex19.1*<sup>-/-</sup> oocytes in this loss of  
function experiment, parallels the increase in chromatin-associated AcSMC3 in response to gain of  
415 TEX19 function detected using an independent methodological approach in cultured cells (Figure  
4C,D). Thus the reduced anti-acSMC3 immunostaining in *Tex19.1*<sup>-/-</sup> oocyte chromosomes likely  
represents a bone fide decrease in the amount of chromosome-associated AcSMC3 in these cells.  
Furthermore, the reduced arm cohesion in *Tex19.1*<sup>-/-</sup> oocytes correlates better with anti-AcSMC3  
than bulk anti-REC8 immunostaining suggesting that, like in mitotic cells, arm cohesion is  
420 mediated by an AcSMC3-marked subpopulation of cohesin in meiotic oocytes. Taken together, the  
phenotypic and functional analyses in this study suggest that *Tex19.1* plays a role in maintaining  
this AcSMC3-marked subpopulation of cohesin, and arm cohesion, in postnatal mouse oocytes in  
order to prevent aneuploidy from arising in the female germline.

## 425 **Discussion**

### **Maintenance of Cohesin in Postnatal Oocytes**

The data in this study suggests that the mammal-specific protein *Tex19.1* acts to maintain sister chromatid cohesion and prevent aneuploidy in postnatal mouse oocytes. Previous studies in mouse oocytes suggest that age-dependent loss of cohesion and chromosome-associated REC8 may  
430 contribute to the age-dependent aneuploidy seen in both human and mouse oocytes (Chiang et al. 2010; Lister et al. 2010). Loss of *Tex19.1* affects cohesion in a distinct way from normal ageing as it primarily affects arm cohesion but not centromeric cohesion. Differential regulation of arm and centromeric cohesion is a central feature of meiosis I, therefore it is not unexpected that a regulatory pathway could affect only of these properties. However, even though *Tex19.1* expression declines in  
435 ageing germinal vesicle stage oocytes (Pan et al. 2008), age-dependent changes in *Tex19.1* activity could not fully explain the age-dependent loss of cohesion in ageing mouse oocytes. As age-dependent oocyte aneuploidy likely represents interactions between multiple factors and activities, it will be important to evaluate the contribution of the *Tex19.1* pathway described here to the age-dependent weakening of arm cohesion, abnormal chromosome segregation patterns, and ‘reverse’  
440 chromosome segregation reported in human oocytes (Ottolini et al. 2015; Zielinska et al. 2015; Sakakibara et al. 2015).

Another important distinction between the *Tex19.1*<sup>-/-</sup> oocyte phenotype and ageing oocytes is in the population of cohesin affected: loss of *Tex19.1* affects the AcSMC3-marked subpopulation of  
445 cohesin rather than bulk chromosome-associated REC8 in prometaphase I oocytes. It is possible that the differential behaviour of AcSMC3 and REC8 cohesin subunits in *Tex19.1*<sup>-/-</sup> oocytes reflects deacetylation of the AcSMC3 subunit and the resulting cohesin subunits remaining associated with the chromosomes but not capable of mediating cohesion. Or, perhaps more likely given data in mitotic somatic cells (Schmitz et al. 2007; Deardorff et al. 2012), dissociation of AcSMC3-marked

450 cohesin complexes which cannot be detected with antibodies to other cohesin subunits as it represents a small proportion of the chromosome-associated cohesin. Regardless, these data suggest that, like mitotic cells, meiotic oocytes contain a subpopulation of cohesin marked by AcSMC3 that is associated with cohesion. It will be of interest to determine the effect of oocyte ageing on AcSMC3 in meiotic chromosomes.

455

Meiotic sister chromatid cohesion is established during foetal development in females, then maintained postnatally in the absence of detectable *de novo* incorporation of REC8 protein molecules (Burkhardt et al. 2016; Revenkova et al. 2010; Tachibana-Konwalski et al. 2010). It is not clear when AcSMC3 is established in meiotic oocytes but it seems likely that there will be some  
460 ESCO1 or ESCO2 acetylation of SMC3 in oocytes during foetal development. In mitotic cells, ESCO1 can acetylate SMC3 independently of DNA replication (Minamino et al. 2015), and it is possible that maintenance of cohesion in post-natal oocytes involves some removal and renewal of AcSMC3, the balance of which could be perturbed in *Tex19.1*<sup>-/-</sup> oocytes. Alternatively, it is possible that AcSMC3 behaves similarly to REC8 and is generated in foetal oocytes and maintained  
465 postnatally in the absence of *de novo* acetylation. Further work is needed to assess AcSMC3 dynamics in post-natal oocytes and how this might relate to the progressive loss of cohesion during oocyte ageing.

### **Roles for *Tex19.1* and *Ubr2* in Regulating AcSMC3**

470 The data presented in this study suggests that *Tex19.1* and *Ubr2* have previously uncharacterised roles in regulating AcSMC3-marked cohesin (Figure 8). *Tex19.1* has not been previously linked with cohesin regulation, but the budding yeast ortholog of *Ubr2*, *UBR1*, stimulates degradation of the C-terminal Rad21 fragment generated by separase cleavage during mitosis (Rao et al. 2001). Degradation of the separase cleavage fragment of REC8 might not be expected to have a direct

475 effect on cohesion as cleavage of a cohesin subunit is sufficient to destroy the integrity of the  
cohesin ring and remove arm cohesion in meiosis (Tachibana-Konwalski et al. 2010), and the C-  
terminal REC8 cleavage fragment does not need to be an N-end rule substrate for cohesion to be  
efficiently removed from meiotic chromosomes (Tachibana-Konwalski et al. 2010). Moreover,  
although UBR2 promotes degradation of the C-terminal separase cleavage fragment of the REC8  
480 meiotic kleisin in spermatocytes, the equivalent fragment of RAD21 is not rapidly degraded in  
somatic mitosis (Liu et al. 2016) where TEX19 and UBR2 can still regulate AcSMC3. Notably, the  
effect of deleting *UBR1* on AcSMC3 abundance in yeast has not been reported and it is not clear  
whether defects in regulation of AcSMC3 are contributing to the aneuploidy in *Ubr1<sup>Δ/Δ</sup>* yeast (Rao  
et al. 2001). It is possible that *Ubr2*, and its orthologs, might be regulating cohesin in multiple ways  
485 and that the regulation of AcSMC3 by *Tex19.1* and *Ubr2* represents a previously undescribed  
activity of these genes.

Although we have shown that *Ubr2* negatively regulates AcSMC3 in mouse spleen, the substrates  
and pathways involved are currently not clear. UBR2 could directly target AcSMC3-marked  
490 cohesin for ubiquitin-dependent proteolysis through a potential Met- $\Phi$  motif (Kim et al. 2014) at the  
N-terminus of SMC3. Alternatively, UBR2 could regulate the AcSMC3-marked population of  
cohesin indirectly through regulating sororin, which protects AcSMC3-containing cohesin from  
WAPL-dependent removal (Nishiyama et al. 2010), through ESCO1, ESCO2, or HDAC8 which  
mediate the acetylation and deacetylation of SMC3 (Deardorff et al. 2012; Minamino et al. 2015;  
495 Zhang et al. 2008), through regulating other cohesin subunits in the AcSMC3-containing cohesin  
complexes, or through other mechanisms. These possibilities are not mutually exclusive and further  
research will be required to understand how UBR2 specifically targets and regulates the AcSMC3-  
containing subpopulation of cohesin.

500 We show in this study that, mechanistically, *TEX19.1* acts to inhibit the activity of *UBR2* towards  
some N-end rule substrates. It is therefore possible that different *UBR2* substrates could be  
contributing to different aspects of the sexually dimorphic meiotic defects in *Tex19.1*<sup>-/-</sup>  
spermatocytes and oocytes, and the developmental defects in *Tex19.1*<sup>-/-</sup> placentas (Öllinger et al.  
2008; Yang et al. 2010; Reichmann et al. 2013; Tarabay et al. 2013). *TEX19.1* has previously been  
505 shown to interact with *UBR2* in testes lysates (Yang et al. 2010), and the data presented here  
suggests that this interaction likely reflects a regulatory function for *TEX19.1* on *UBR2*. Budding  
yeast *Ubr1* has multiple substrate binding sites, and substrates binding to the N-end rule binding site  
inhibit other substrates binding via internal degrons to different sites in *Ubr1* (Xia et al. 2008).  
*TEX19.1* has a role in repressing retrotransposons (Reichmann et al. 2013, 2012; Öllinger et al.  
510 2008) and inhibition of *UBR2* binding to N-end rule substrates could potentially reflect *TEX19.1*  
re-targeting *UBR2* to internal degron substrates relevant for suppressing retrotransposons.  
Extensive de-repression of retrotransposons has been proposed to contribute to reduced foetal  
*MLH1* foci frequency and aneuploidy in *Mael*<sup>-/-</sup> oocytes (Malki et al. 2014), but this *MLH1*  
phenotype is not evident in foetal *Tex19.1*<sup>-/-</sup> oocytes, possibly because retrotransposon de-repression  
515 in *Tex19.1*<sup>-/-</sup> mutants tends to be much less severe than in *Mael*<sup>-/-</sup> mutants (Crichton et al. 2017).  
Therefore, although retrotransposon de-repression could be contributing to some aspects of the  
*Tex19.1*<sup>-/-</sup> phenotype in oocytes, the data from somatic tissues in this study suggests that at least part  
of the mechanism through which *Tex19.1* is regulating *AcSMC3* involves inhibition of *UBR2*,  
which in turn negatively regulates *AcSMC3*.

520

Loss of *Tex19.1* results in mis-segregation of some, but not all, chromosomes, and the generation of  
aneuploidy in some, but not all, oocytes. The *Tex19.1*<sup>-/-</sup> oocyte phenotype is therefore less severe  
than a cohesin mutant (Revenkova et al. 2004; Tachibana-Konwalski et al. 2010), but more similar  
to the aneuploidy typically seen in human oocytes. There are biases in mis-segregation frequencies

525 and patterns between different chromosomes in human oocytes (Nagaoka et al. 2012), and it is not clear whether specific chromosomes are more susceptible to aneuploidy in *Tex19.1*<sup>-/-</sup> oocytes. The effect of *TEX19* on sister chromatid separation when expressed in mitotic somatic cells is also fairly modest relative to the effects of the prophase pathway (Waizenegger et al. 2000; Tedeschi et al. 2013), and may have little consequence for timely removal of cohesin during mitosis in these cells.

530 Proliferating cells in culture pass through G2/M relatively quickly when compared to meiotic oocytes, and the relatively modest effect of *TEX19* expression in these cells suggests that the *Tex19.1-Ubr2* pathway for regulating AcSMC3 and arm cohesion that we describe here may not have an important role in mitotic cells. However, when meiotic oocytes are arrested in dictyate for months, or decades in the case of humans, proteasome-dependent degradation of cellular substrates

535 may start to take its toll during this time. Indeed, regulation of proteasome-dependent degradation may be a key aspect of proteostasis, maintenance of sister chromatid cohesion, and prevention of aneuploidy in postnatal mammalian oocytes.

## Materials and Methods

### 540 Mice

*Tex19.1*<sup>-/-</sup> animals on a C57BL/6 genetic background were bred from heterozygous crosses and genotyped as described (Öllinger et al. 2008). For embryonic stages, the day the vaginal plug was found was designated E0.5. *Tex19.1*<sup>-/-</sup> females were analysed at 6-14 weeks old alongside either *Tex19.1*<sup>+/+</sup> or *Tex19.1*<sup>+/-</sup> age-matched control animals from the same breeding colony. *Tex19.1*<sup>+/-</sup> control females have normal fertility and data from these and *Tex19.1*<sup>+/+</sup> females were combined as *Tex19.1*<sup>+/+</sup> controls. *Ubr2*<sup>-/-</sup> mice were generated by CRISPR/Cas9 double nickase-mediated genome editing in zygotes and genotyped as described (Crichton et al. 2017). These *Ubr2*<sup>-/-</sup> mice carry a premature stop codon at cysteine-121 within the UBR domain of UBR2 (Uniprot Q6WKZ8-1). Founder pups were genotyped, heterozygotes backcrossed to C57BL/6 then interbred. *Ubr2*<sup>-/-</sup> mice were phenotypically grossly normal except for small testes and an almost complete absence of epididymal sperm as previously reported (Kwon et al. 2003). Animal experiments were carried out under UK Home Office Project Licence PPL 60/4424 and in accordance with local ethical guidelines. Means are reported ± standard error.

### 555 Oocyte Collection, Culture, and Imaging

For hormone injections, mice were injected intraperitoneally with 5 IU pregnant mare serum (PMS), followed by 5 IU human chorionic gonadotrophin (hCG) 46-48 hours later (Nagy et al. 2003). For meiosis I, germinal vesicle (GV) stage oocytes were isolated from ovaries 42 hours post-PMS by pricking with a needle in M2 (Sigma), separated from cumulus cells by pipetting, then cultured in M16 (Sigma) at 37°C in 5% CO<sub>2</sub>. Oocytes that underwent germinal vesicle breakdown (GVBD) within 2 hours were cultured for an additional 3 or 5 hours to obtain prometaphase I oocytes. Ovulated metaphase II oocytes (16-18 hours post-hCG) and zygotes were recovered from the oviduct in FHM (Millipore) and separated from cumulus cells by treating with 0.5mg/mL



hyaluronidase in FHM for 2-5 minutes (Nagy et al. 2003). Metaphase II oocytes were  
565 parthenogenetically activated by culturing in KSOM (Millipore) containing 5 mM SrCl<sub>2</sub> and 2 mM  
EGTA at 37°C in 5% CO<sub>2</sub> for 2 hours (Kishigami and Wakayama 2007). For chromosome spreads,  
zygotes were cultured overnight in KSOM containing 0.1 µg/mL colcemid (Life Technologies) at  
37°C in 5% CO<sub>2</sub>. For live imaging, GV stage oocytes were maintained in M16 containing 100 µM  
3-isobutyl-1-methylxanthine (IBMX) at 37°C for 2 hours during transportation between Edinburgh  
570 and Newcastle, then microinjected using a pressure injector (Narashige, Japan) on a Nikon Diaphot  
microscope. Oocytes were microinjected with mRNA encoding Histone H2-RFP, placed in G-IVF  
culture medium (Vitrolife Ltd, Sweden) and imaged for 14–20 hr on a Nikon Ti inverted  
microscope fitted with a stage-mounted incubator at 37°C in 7% CO<sub>2</sub>. Bright-field and fluorescence  
images were acquired every 20 minutes on five 0.75 µm planes using a Photometrics CoolSnapHQ  
575 interline cooled charge-coupled device camera (Roper Scientific Inc.). Hardware control was  
performed using MetaMorph (Molecular Devices), and images analysed and processed using Fiji  
software (Schindelin et al. 2012) using maximum intensity projections.

### **Chromosome Spreads**

580 Chromosome spreads were performed by incubating zygotes or postnatal oocytes in 1% trisodium  
citrate for 15-20 minutes, then fixing in 3:1 methanol:acetic acid as described (Yuan et al. 2002).  
Slides were mounted in Vectashield hard set mounting media containing DAPI (Vector Labs).  
Fluorescence in situ hybridization (FISH) for major satellite DNA was carried out on  
methanol:acetic acid-fixed chromosome spreads as described previously (Boyle et al. 2001).  
585 Preparation and analysis of pachytene spreads from E18.5 oocytes were performed as described  
previously (Bolcun-Filas et al. 2009). To assess the position of MLH1 foci, centromeric ends of  
chromosome axes were identified by the DAPI-dense pericentromeric heterochromatin. Primary  
antibodies were 1:200 mouse anti-SYCP3 (Abcam), 1:250 rabbit anti-SYCP1 (Abcam), 1:50 mouse

anti-MLH1 (BD Biosciences) 1:500 rabbit anti-SYCP3 (LSBio). Texas Red and FITC-conjugated  
590 secondary antibodies (Jackson ImmunoResearch) and Alexa Fluor-conjugated secondary antibodies  
(Invitrogen) were used at 1:500, and DAPI (Sigma) at 0.02  $\mu\text{g}/\text{mL}$ . Immunostaining on  
prometaphase I oocytes chromosomes was performed essentially as described (Susiarjo et al. 2009),  
except that zona pellucidae were removed with Acid Tyrode's, and that zona-free oocytes were  
incubated for 2 minutes in 0.5% trisodium citrate immediately prior to fixation. Primary antibodies  
595 were 1:50 human anti-centromere antibodies (Antibodies Incorporated), 1:50 affinity-purified  
guinea pig anti-REC8 (Kouznetsova et al. 2005), and 1  $\mu\text{g}/\text{mL}$  mouse anti-acetylated SMC3  
(Nishiyama et al. 2010). Images from chromosome spreads were scored blind for aneuploidy,  
chiasmata frequency and chiasmata position by coding filenames by computer script prior to  
scoring. Immunostaining was quantified using Fiji software (Schindelin et al. 2012). The  
600 immunofluorescence signal above background was measured within each bivalent's DAPI area for  
each antibody and the ratio of anti-cohesin:anti-centromere antibody staining was calculated for  
each bivalent. The median bivalent ratio was then determined for each oocyte. Sister centromere  
separation was measured from anti-centromeric antibody-stained chromosome spreads imaged in  
three dimensions using an Axioplan II fluorescence microscope (Zeiss) fitted with a  
605 piezoelectrically-driven objective mount and deconvolved with Volocity (PerkinElmer).

### **Analysis of Cohesin and Cohesion in HEK293T Cells**

HEK293-derived cells were grown in DMEM (Invitrogen) containing 10% foetal calf serum, 2 mM  
L-glutamine, and 1% penicillin-streptomycin at 37°C in 5% CO<sub>2</sub>. HEK293T cells were transfected  
610 with pCMV-*TEX19* expression vector and empty pCMV vector using Lipofectamine 2000  
(Invitrogen). To synchronise cells with a double thymidine block, HEK293T cells 8 hours post-  
transfection were incubated in media containing 1.25 mM thymidine for 16 hrs, in fresh media for 8  
hrs, then in media containing 1.25 mM thymidine for 16 hrs. Cells were then released into fresh

media for 0, 2 or 4 hrs to obtain populations enriched for cells in G1/S, S or G2/M phases of the cell  
615 cycle respectively. Cells were fixed for flow cytometry in ice-cold 70% ethanol, then incubated in  
50 µg/ml propidium iodide and 100 µg/ml RnaseA in PBS for 1 hr. DNA content was analysed  
using a BD LSRFortessa flow cytometer (BD Biosciences). Chromatin was isolated from HEK293T  
cells as described (Méndez and Stillman 2000) except that 5 mM sodium butyrate was included in  
the cell lysis buffer to inhibit histone deacetylases. Chromatin was analysed by SDS-PAGE/Western  
620 blotting using the following primary antibodies: 1:1000 mouse anti-AcSmc3 (Nishiyama et al.  
2010), 1:1000 rabbit anti-Smc3 (Abcam), 1:1000 rabbit anti-Smc1 (Abcam) 1:500 rabbit anti-SA2  
(Abcam) 1:100 rabbit anti-Rad21 (Abcam). HRP-conjugated goat anti-mouse (BioRad) and goat  
anti rabbit (NEB) secondary antibodies were used at 1:5000 and developed using Supersignal West  
Pico Chemiluminescent Substrate (Invitrogen). For MG132 experiments, transfected HEK293T  
625 cells were treated 8 hours post-transfection with 20 mM MG132 or DMSO for 18 hours and  
chromatin isolated for analysis by Western blotting. 1:2000 rabbit anti-TEX19 (Abcam) was used to  
confirm expression of TEX19 in transfected cells. Chromosome spreads from HEK293T cells were  
prepared by re-suspending cells in hypotonic solution (0.5% sodium citrate, 0.56% potassium  
chloride), then fixing in 3:1 methanol:acetic acid, and images scored blind for cohesion between  
630 chromosome arms after coding filenames by computer script.

### **GFP-Trap and Mass Spectrometry**

The CMV promoter in pEYFP-N1 (Clontech) was replaced with the CAG promoter (Niwa et al.  
1991), then the TEX19.1 open reading frame subcloned in frame with EYFP. HEK293 cells were  
635 transfected with pCAG-TEX19.1-YFP and pCAG-YFP and stable cell lines expressing similar  
levels of YFP fluorescence isolated by flow cytometry. Cytoplasmic lysates were prepared by  
Dounce homogenizing cells in buffer A (10 mM HEPES pH7.6, 15 mM KCl, 2 mM MgCl<sub>2</sub>, 0.1mM  
EDTA, 1mM DTT, Complete protease inhibitors (Roche)), then adding one tenth volume buffer B

(50 mM HEPES pH7.6, 1M KCl, 30 mM MgCl<sub>2</sub>, 0.1mM EDTA, 1mM DTT, Complete protease inhibitors). Nuclei were removed by centrifugation at 3400 g for 15 mins at 4°C, and glycerol was added to the supernatant to 10%. YFP-containing protein complexes were isolated from cytoplasmic lysates using GFP-Trap agarose beads (Chromotek) according to the supplier's instructions. Co-immunoprecipitating proteins were analysed by SDS-PAGE, visualised by colloidal blue staining, and prominent bands excised. In-gel digestion with trypsin, and mass spectrometry using a 4800 MALDI TOF/TOF Analyser (ABSciex) equipped with a Nd:YAG 355nm laser was performed by St. Andrews University Mass Spectrometry and Proteomics Facility. Data was analysed using the Mascot search engine (Matrix Science) to interrogate the NCBIInr database using tolerances of  $\pm 0.2$  Da for peptide and fragment masses, allowing for one missed trypsin cleavage, fixed cysteine carbamidomethylation and variable methionine oxidation. Protein identities were confirmed by SDS-PAGE/Western blotting using mouse anti-GFP (Roche, 1:2000 dilution) and mouse anti-UBR2 (Abcam, 1:1000 dilution) antibodies.

### **N-End Rule Reporter Assays**

Ubiquitin fusion proteins that generate M-GFP, L-GFP, R-GFP and Ub<sup>G76V</sup>-GFP (Ub-GFP) reporters (Dantuma et al. 2000) were subcloned into pcDNA5/FRT (Invitrogen) then integrated into Flp-In-293 cells (Invitrogen) according to the supplier's instructions. The resulting stable cell lines were transiently transfected with a 1:3 ratio of mCherry expression plasmid and either an empty expression vector (pMONO-zeo, Invitrogen), or pMONO-zeo-TEX19.1 using Lipofectamine 2000 (Invitrogen) as instructed by the manufacturer. Cells were analysed by flow cytometry using a BD FACS Aria II cell sorter (BD Biosciences) 48 hours post-transfection, and the amount of GFP fluorescence in the mCherry-positive population was measured. For MG132 treatment, these stable cell lines, were incubated in culture media containing 25  $\mu$ M MG132 (Cayman Chemicals) for 7 hours. To assess GFP protein abundance, the stable cell lines were transiently transfected with

pEXPR-IBA105 (IBA Life Sciences) or pEXPR-IBA105-TEX19.1, lysed in RIPA buffer 48 hours  
665 post-transfection, and analysed by SDS-PAGE/Western blotting. Mouse anti-GFP antibodies  
(Roche) were used at 1:5000 dilution, rabbit anti-lamin B antibodies (Abcam) at 1:10000, and rabbit  
anti-Strep Tag II (Abcam) at 1:1000.

### **N-End Rule Peptide Pull-Downs**

670 Type I (RIFSTDTGPGGC), type II (FIFSTDTGPGGC) and negative control (GIFSTDTGPGGC)  
N-end rule peptides based on Sindbis virus polymerase nsP4 (Tasaki et al. 2005) were synthesised  
(Severn Biotech Ltd.) and coupled to Sulfolink resin (Pierce) according to the manufacturer's  
instructions. HEK293T cells were transiently transfected with pEXPR-IBA105 or pEXPR-IBA105-  
TEX19.1 24 hours before lysis. HEK293T cells were incubated in lysis buffer (10 mM Tris pH7.5,  
675 150 mM NaCl, 0.5 mM EDTA, 0.5% NP-40, Complete protease inhibitors) for 30 minutes at 4°C,  
diluted 5-fold in lysis buffer lacking NP-40, pre-cleared with inactivated Sulfolink resin, then  
incubated with peptide resins at 4°C overnight. The resin was washed three times with wash buffer  
(10 mM Tris pH7.5, 150 mM NaCl, 0.5 mM EDTA, 0.1% NP-40) and bound protein eluted by  
boiling in Laemmli buffer then analysed by SDS-PAGE/Western blotting. Goat anti-UBR2  
680 antibodies (Novus Biologicals) were used at 1:250 dilution.

## Acknowledgements

We thank Christer Hoog and Nico Dantuma (both Karolinska Institutet, Stockholm, Sweden) for kindly providing anti-REC8 antibodies and Ub-L-GFP constructs respectively. We are grateful to  
685 Sally Shirran and Catherine Botting (Mass Spectrometry and Proteomics Facility, University of St. Andrews, UK) for performing mass spectrometry on anti-YFP immunoprecipitates, Hemant Begani (MRC HGU, Edinburgh, UK) for help and reagents for generating *Ubr2<sup>-/-</sup>* mice, Nick Hastie (MRC HGU, Edinburgh, UK), Jan Ellenberg (EMBL, Heidelberg, Germany) and Mariana Coelho Correia Da Silva (Institute of Molecular Pathology, Vienna, Austria) for support, advice and helpful  
690 suggestions, and Javier Caceres (MRC HGU, Edinburgh, UK) for comments on the manuscript.

## References

- Agostinho A, Manneberg O, van Schendel R, Hernández-Hernández A, Kouznetsova A, Blom H, Brismar H, Höög C. 2016. High density of REC8 constrains sister chromatid axes and prevents illegitimate synaptonemal complex formation. *EMBO Rep* **17**:901–913. doi:10.15252/embr.201642030.
- Baker SM, Plug AW, Prolla TA, Bronner CE, Harris AC, Yao X, Christie DM, Monell C, Arnheim N, Bradley A, et al. 1996. Involvement of mouse Mlh1 in DNA mismatch repair and meiotic crossing over. *Nat Genet* **13**:336–342. doi:10.1038/ng0796-336.
- Biswas U, Hempel K, Llano E, Pendas A, Jessberger R. 2016. Distinct Roles of Meiosis-Specific Cohesin Complexes in Mammalian Spermatogenesis. *PLoS Genet* **12**:e1006389. doi:10.1371/journal.pgen.1006389.
- Biswas U, Wetzker C, Lange J, Christodoulou EG, Seifert M, Beyer A, Jessberger R. 2013. Meiotic cohesin SMC1 $\beta$  provides prophase I centromeric cohesion and is required for multiple synapsis-associated functions. *PLoS Genet* **9**:e1003985. doi:10.1371/journal.pgen.1003985.
- Bolcun-Filas E, Hall E, Speed R, Taggart M, Grey C, de Massy B, Benavente R, Cooke HJ. 2009. Mutation of the mouse Syc1 gene disrupts synapsis and suggests a link between synaptonemal complex structural components and DNA repair. *PLoS Genet* **5**:e1000393. doi:10.1371/journal.pgen.1000393.
- Boyle S, Gilchrist S, Bridger JM, Mahy NL, Ellis JA, Bickmore WA. 2001. The spatial organization of human chromosomes within the nuclei of normal and emerin-mutant cells. *Hum Mol Genet* **10**:211–219.
- Burkhardt S, Borsos M, Szydłowska A, Godwin J, Williams SA, Cohen PE, Hirota T, Saitou M, Tachibana-Konwalski K. 2016. Chromosome Cohesion Established by Rec8-Cohesin in Fetal Oocytes Is Maintained without Detectable Turnover in Oocytes Arrested for Months in Mice. *Curr Biol* **26**:678–685. doi:10.1016/j.cub.2015.12.073.
- Celebi C, van Montfoort A, Skory V, Kieffer E, Kuntz S, Mark M, Viville S. 2012. Tex 19 paralogs exhibit a gonad and placenta-specific expression in the mouse. *J Reprod Dev* **58**:360–365.
- Chiang T, Duncan FE, Schindler K, Schultz RM, Lampson MA. 2010. Evidence that weakened centromere cohesion is a leading cause of age-related aneuploidy in oocytes. *Curr Biol* **20**:1522–1528. doi:10.1016/j.cub.2010.06.069.
- Crichton JH, Playfoot CJ, MacLennan M, Read D, Cooke HJ, Adams IR. 2017. Tex19.1 Regulates Meiotic DNA Double Strand Break Frequency in Mouse Spermatocytes. *bioRxiv* 099119. doi:10.1101/099119.
- Dantuma NP, Lindsten K, Glas R, Jellne M, Masucci MG. 2000. Short-lived green fluorescent proteins for quantifying ubiquitin/proteasome-dependent proteolysis in living cells. *Nat Biotechnol* **18**:538–543. doi:10.1038/75406.
- Deardorff MA, Bando M, Nakato R, Watrin E, Itoh T, Minamino M, Saitoh K, Komata M, Katou Y, Clark D, et al. 2012. HDAC8 mutations in Cornelia de Lange syndrome affect the cohesin acetylation cycle. *Nature* **489**:313–317. doi:10.1038/nature11316.



Hackett JA, Reddington JP, Nestor CE, Dunican DS, Branco MR, Reichmann J, Reik W, Surani MA, Adams IR, Meehan RR. 2012. Promoter DNA methylation couples genome-defence mechanisms to epigenetic reprogramming in the mouse germline. *Development* **139**:3623–3632. doi:10.1242/dev.081661.

Hassold T, Hunt P. 2001. To err (meiotically) is human: the genesis of human aneuploidy. *Nat Rev Genet* **2**:280–291. doi:10.1038/35066065.

Hauf S, Waizenegger IC, Peters JM. 2001. Cohesin cleavage by separase required for anaphase and cytokinesis in human cells. *Science* **293**:1320–1323. doi:10.1126/science.1061376.

Henderson SA, Edwards RG. 1968. Chiasma frequency and maternal age in mammals. *Nature* **218**:22–28.

Herbert M, Kalleas D, Cooney D, Lamb M, Lister L. 2015. Meiosis and maternal aging: insights from aneuploid oocytes and trisomy births. *Cold Spring Harb Perspect Biol* **7**:a017970. doi:10.1101/cshperspect.a017970.

Hodges CA, Revenkova E, Jessberger R, Hassold TJ, Hunt PA. 2005. SMC1beta-deficient female mice provide evidence that cohesins are a missing link in age-related nondisjunction. *Nat Genet* **37**:1351–1355. doi:10.1038/ng1672.

Holloway JK, Booth J, Edlmann W, McGowan CH, Cohen PE. 2008. MUS81 generates a subset of MLH1-MLH3-independent crossovers in mammalian meiosis. *PLoS Genet* **4**:e1000186. doi:10.1371/journal.pgen.1000186.

Homer HA, McDougall A, Levasseur M, Yallop K, Murdoch AP, Herbert M. 2005. Mad2 prevents aneuploidy and premature proteolysis of cyclin B and securin during meiosis I in mouse oocytes. *Genes Dev* **19**:202–207. doi:10.1101/gad.328105.

Ishiguro K, Kim J, Fujiyama-Nakamura S, Kato S, Watanabe Y. 2011. A new meiosis-specific cohesin complex implicated in the cohesin code for homologous pairing. *EMBO Rep* **12**:267–275. doi:10.1038/embor.2011.2.

Ishiguro K-I, Kim J, Shibuya H, Hernández-Hernández A, Suzuki A, Fukagawa T, Shioi G, Kiyonari H, Li XC, Schimenti J, et al. 2014. Meiosis-specific cohesin mediates homolog recognition in mouse spermatocytes. *Genes Dev* **28**:594–607. doi:10.1101/gad.237313.113.

Kim H-K, Kim R-R, Oh J-H, Cho H, Varshavsky A, Hwang C-S. 2014. The N-terminal methionine of cellular proteins as a degradation signal. *Cell* **156**:158–169. doi:10.1016/j.cell.2013.11.031.

Kishigami S, Wakayama T. 2007. Efficient strontium-induced activation of mouse oocytes in standard culture media by chelating calcium. *J Reprod Dev* **53**:1207–1215.

Kouznetsova A, Lister L, Nordenskjöld M, Herbert M, Höög C. 2007. Bi-orientation of achiasmatic chromosomes in meiosis I oocytes contributes to aneuploidy in mice. *Nat Genet* **39**:966–968. doi:10.1038/ng2065.

Kouznetsova A, Novak I, Jessberger R, Höög C. 2005. SYCP2 and SYCP3 are required for cohesin core integrity at diplotene but not for centromere cohesion at the first meiotic division. *J Cell Sci* **118**:2271–2278. doi:10.1242/jcs.02362.



- Kuntz S, Kieffer E, Bianchetti L, Lamoureux N, Fuhrmann G, Viville S. 2008. Tex19, a mammalian-specific protein with a restricted expression in pluripotent stem cells and germ line. *Stem Cells* **26**:734–744. doi:10.1634/stemcells.2007-0772.
- Kwon YT, Xia Z, An JY, Tasaki T, Davydov IV, Seo JW, Sheng J, Xie Y, Varshavsky A. 2003. Female lethality and apoptosis of spermatocytes in mice lacking the UBR2 ubiquitin ligase of the N-end rule pathway. *Mol Cell Biol* **23**:8255–8271.
- Ladurner R, Kreidl E, Ivanov MP, Ekker H, Idarraga-Amado MH, Busslinger GA, Wutz G, Cisneros DA, Peters J-M. 2016. Sororin actively maintains sister chromatid cohesion. *EMBO J* **35**:635–653. doi:10.15252/embj.201592532.
- LeMaire-Adkins R, Radke K, Hunt PA. 1997. Lack of checkpoint control at the metaphase/anaphase transition: a mechanism of meiotic nondisjunction in mammalian females. *J Cell Biol* **139**:1611–1619.
- Lister LM, Kouznetsova A, Hyslop LA, Kalleas D, Pace SL, Barel JC, Nathan A, Floros V, Adelfalk C, Watanabe Y, et al. 2010. Age-related meiotic segregation errors in mammalian oocytes are preceded by depletion of cohesin and Sgo2. *Curr Biol* **20**:1511–1521. doi:10.1016/j.cub.2010.08.023.
- Liu Y-J, Liu C, Chang Z, Wadas B, Brower CS, Song Z-H, Xu Z-L, Shang Y-L, Liu W-X, Wang L-N, et al. 2016. Degradation of the Separase-cleaved Rec8, a Meiotic Cohesin Subunit, by the N-end Rule Pathway. *J Biol Chem* **291**:7426–7438. doi:10.1074/jbc.M116.714964.
- MacLennan M, Crichton JH, Playfoot CJ, Adams IR. 2015. Oocyte development, meiosis and aneuploidy. *Semin Cell Dev Biol* **45**:68–76. doi:10.1016/j.semcdb.2015.10.005.
- Malki S, van der Heijden GW, O'Donnell KA, Martin SL, Bortvin A. 2014. A role for retrotransposon LINE-1 in fetal oocyte attrition in mice. *Dev Cell* **29**:521–533. doi:10.1016/j.devcel.2014.04.027.
- McGuinness BE, Anger M, Kouznetsova A, Gil-Bernabé AM, Helmhart W, Kudo NR, Wuensche A, Taylor S, Hoog C, Novak B, et al. 2009. Regulation of APC/C activity in oocytes by a Bub1-dependent spindle assembly checkpoint. *Curr Biol* **19**:369–380. doi:10.1016/j.cub.2009.01.064.
- McNicoll F, Stevense M, Jessberger R. 2013. Cohesin in gametogenesis. *Curr Top Dev Biol* **102**:1–34. doi:10.1016/B978-0-12-416024-8.00001-5.
- Méndez J, Stillman B. 2000. Chromatin association of human origin recognition complex, cdc6, and minichromosome maintenance proteins during the cell cycle: assembly of prereplication complexes in late mitosis. *Mol Cell Biol* **20**:8602–8612.
- Minamino M, Ishibashi M, Nakato R, Akiyama K, Tanaka H, Kato Y, Negishi L, Hirota T, Sutani T, Bando M, et al. 2015. Escol1 Acetylates Cohesin via a Mechanism Different from That of Escol2. *Curr Biol* **25**:1694–1706. doi:10.1016/j.cub.2015.05.017.
- Nagaoka SI, Hassold TJ, Hunt PA. 2012. Human aneuploidy: mechanisms and new insights into an age-old problem. *Nat Rev Genet* **13**:493–504. doi:10.1038/nrg3245.
- Nagy A, Gertsenstein M, Vintersten K, Behringer R. 2003. *Manipulating the Mouse Embryo: A Laboratory Manual*. 3rd ed. Cold Spring Harbor Laboratory Press, Cold Spring Harbor, New York,

USA.

Nakajima M, Kumada K, Hatakeyama K, Noda T, Peters J-M, Hirota T. 2007. The complete removal of cohesin from chromosome arms depends on separase. *J Cell Sci* **120**:4188–4196. doi:10.1242/jcs.011528.

Nasmyth K, Haering CH. 2009. Cohesin: its roles and mechanisms. *Annu Rev Genet* **43**:525–558. doi:10.1146/annurev-genet-102108-134233.

Nishiyama T, Ladurner R, Schmitz J, Kreidl E, Schleiffer A, Bhaskara V, Bando M, Shirahige K, Hyman AA, Mechtler K, et al. 2010. Sororin mediates sister chromatid cohesion by antagonizing Wapl. *Cell* **143**:737–749. doi:10.1016/j.cell.2010.10.031.

Nishiyama T, Sykora MM, Huis in 't Veld PJ, Mechtler K, Peters J-M. 2013. Aurora B and Cdk1 mediate Wapl activation and release of acetylated cohesin from chromosomes by phosphorylating Sororin. *Proc Natl Acad Sci USA* **110**:13404–13409. doi:10.1073/pnas.1305020110.

Niwa H, Yamamura K, Miyazaki J. 1991. Efficient selection for high-expression transfectants with a novel eukaryotic vector. *Gene* **108**:193–199.

Novak I, Wang H, Revenkova E, Jessberger R, Scherthan H, Höög C. 2008. Cohesin Smc1beta determines meiotic chromatin axis loop organization. *J Cell Biol* **180**:83–90. doi:10.1083/jcb.200706136.

Öllinger R, Childs AJ, Burgess HM, Speed RM, Lundegaard PR, Reynolds N, Gray NK, Cooke HJ, Adams IR. 2008. Deletion of the pluripotency-associated Tex19.1 gene causes activation of endogenous retroviruses and defective spermatogenesis in mice. *PLoS Genet* **4**:e1000199. doi:10.1371/journal.pgen.1000199.

Ottolini CS, Newnham LJ, Capalbo A, Natesan SA, Joshi HA, Cimadomo D, Griffin DK, Sage K, Summers MC, Thornhill AR, et al. 2015. Genome-wide maps of recombination and chromosome segregation in human oocytes and embryos show selection for maternal recombination rates. *Nat Genet* **47**:727–735. doi:10.1038/ng.3306.

Ouyang Y, Kwon YT, An JY, Eller D, Tsai S-C, Diaz-Perez S, Troke JJ, Teitell MA, Marahrens Y. 2006. Loss of Ubr2, an E3 ubiquitin ligase, leads to chromosome fragility and impaired homologous recombinational repair. *Mutat Res* **596**:64–75. doi:10.1016/j.mrfmmm.2005.12.016.

Pan H, Ma P, Zhu W, Schultz RM. 2008. Age-associated increase in aneuploidy and changes in gene expression in mouse eggs. *Dev Biol* **316**:397–407. doi:10.1016/j.ydbio.2008.01.048.

Rao H, Uhlmann F, Nasmyth K, Varshavsky A. 2001. Degradation of a cohesin subunit by the N-end rule pathway is essential for chromosome stability. *Nature* **410**:955–959. doi:10.1038/35073627.

Reichmann J, Crichton JH, Madej MJ, Taggart M, Gautier P, Garcia-Perez JL, Meehan RR, Adams IR. 2012. Microarray analysis of LTR retrotransposon silencing identifies Hdac1 as a regulator of retrotransposon expression in mouse embryonic stem cells. *PLoS Comput Biol* **8**:e1002486. doi:10.1371/journal.pcbi.1002486.

Reichmann J, Reddington JP, Best D, Read D, Öllinger R, Meehan RR, Adams IR. 2013. The genome-defence gene Tex19.1 suppresses LINE-1 retrotransposons in the placenta and prevents

- intra-uterine growth retardation in mice. *Hum Mol Genet* **22**:1791–1806. doi:10.1093/hmg/ddt029.
- Remeseiro S, Cuadrado A, Losada A. 2013. Cohesin in development and disease. *Development* **140**:3715–3718. doi:10.1242/dev.090605.
- Revenkova E, Eijpe M, Heyting C, Hodges CA, Hunt PA, Liebe B, Scherthan H, Jessberger R. 2004. Cohesin SMC1 beta is required for meiotic chromosome dynamics, sister chromatid cohesion and DNA recombination. *Nat Cell Biol* **6**:555–562. doi:10.1038/ncb1135.
- Revenkova E, Herrmann K, Adelfalk C, Jessberger R. 2010. Oocyte cohesin expression restricted to predictyate stages provides full fertility and prevents aneuploidy. *Curr Biol* **20**:1529–1533. doi:10.1016/j.cub.2010.08.024.
- Sakakibara Y, Hashimoto S, Nakaoka Y, Kouznetsova A, Höög C, Kitajima TS. 2015. Bivalent separation into univalents precedes age-related meiosis I errors in oocytes. *Nat Commun* **6**:7550. doi:10.1038/ncomms8550.
- Schindelin J, Arganda-Carreras I, Frise E, Kaynig V, Longair M, Pietzsch T, Preibisch S, Rueden C, Saalfeld S, Schmid B, et al. 2012. Fiji: an open-source platform for biological-image analysis. *Nat Methods* **9**:676–682. doi:10.1038/nmeth.2019.
- Schmitz J, Watrin E, Lénárt P, Mechtler K, Peters J-M. 2007. Sororin Is Required for Stable Binding of Cohesin to Chromatin and for Sister Chromatid Cohesion in Interphase. *Current Biology* **17**:630–636. doi:10.1016/j.cub.2007.02.029.
- Susiarjo M, Rubio C, Hunt P. 2009. Analyzing mammalian female meiosis. *Methods Mol Biol* **558**:339–354. doi:10.1007/978-1-60761-103-5\_20.
- Tachibana-Konwalski K, Godwin J, van der Weyden L, Champion L, Kudo NR, Adams DJ, Nasmyth K. 2010. Rec8-containing cohesin maintains bivalents without turnover during the growing phase of mouse oocytes. *Genes Dev* **24**:2505–2516. doi:10.1101/gad.605910.
- Tarabay Y, Kieffer E, Teletin M, Celebi C, Van Montfoort A, Zamudio N, Achour M, El Ramy R, Gazdag E, Tropel P, et al. 2013. The mammalian-specific Tex19.1 gene plays an essential role in spermatogenesis and placenta-supported development. *Hum Reprod* **28**:2201–2214. doi:10.1093/humrep/det129.
- Tasaki T, Mulder LCF, Iwamatsu A, Lee MJ, Davydov IV, Varshavsky A, Muesing M, Kwon YT. 2005. A family of mammalian E3 ubiquitin ligases that contain the UBR box motif and recognize N-degrons. *Mol Cell Biol* **25**:7120–7136. doi:10.1128/MCB.25.16.7120-7136.2005.
- Tedeschi A, Wutz G, Huet S, Jaritz M, Wuensche A, Schirghuber E, Davidson IF, Tang W, Cisneros DA, Bhaskara V, et al. 2013. Wapl is an essential regulator of chromatin structure and chromosome segregation. *Nature* **501**:564–568. doi:10.1038/nature12471.
- Touati SA, Buffin E, Cladière D, Hached K, Rachez C, van Deursen JM, Wassmann K. 2015. Mouse oocytes depend on BubR1 for proper chromosome segregation but not for prophase I arrest. *Nat Commun* **6**:6946. doi:10.1038/ncomms7946.
- Waizenegger IC, Hauf S, Meinke A, Peters JM. 2000. Two distinct pathways remove mammalian cohesin from chromosome arms in prophase and from centromeres in anaphase. *Cell* **103**:399–410.

- Wang PJ, McCarrey JR, Yang F, Page DC. 2001. An abundance of X-linked genes expressed in spermatogonia. *Nat Genet* **27**:422–426. doi:10.1038/86927.
- Xia Z, Webster A, Du F, Piatkov K, Ghislain M, Varshavsky A. 2008. Substrate-binding sites of UBR1, the ubiquitin ligase of the N-end rule pathway. *J Biol Chem* **283**:24011–24028. doi:10.1074/jbc.M802583200.
- Yang F, Cheng Y, An JY, Kwon YT, Eckardt S, Leu NA, McLaughlin KJ, Wang PJ. 2010. The ubiquitin ligase Ubr2, a recognition E3 component of the N-end rule pathway, stabilizes Tex19.1 during spermatogenesis. *PLoS ONE* **5**:e14017. doi:10.1371/journal.pone.0014017.
- Yuan L, Liu J-G, Hoja M-R, Wilbertz J, Nordqvist K, Höög C. 2002. Female germ cell aneuploidy and embryo death in mice lacking the meiosis-specific protein SCP3. *Science* **296**:1115–1118. doi:10.1126/science.1070594.
- Zhang J, Shi X, Li Y, Kim B-J, Jia J, Huang Z, Yang T, Fu X, Jung SY, Wang Y, et al. 2008. Acetylation of Smc3 by Eco1 is required for S phase sister chromatid cohesion in both human and yeast. *Mol Cell* **31**:143–151. doi:10.1016/j.molcel.2008.06.006.
- Zielinska AP, Holubcova Z, Blayney M, Elder K, Schuh M. 2015. Sister kinetochore splitting and precocious disintegration of bivalents could explain the maternal age effect. *eLife* **4**:e11389. doi:10.7554/eLife.11389.

## Figure Legends

### Figure 1. Subfertility in *Tex19.1*<sup>-/-</sup> Females is Associated with Increased Oocyte

#### 695 Aneuploidy

A, B. Graphs showing mean number of pups per litter and E0.5 zygotes per female after mating with wild-type males (*Tex19.1*<sup>+/-</sup> and *Tex19.1*<sup>-/-</sup> females have mean litter sizes of  $8.2 \pm 0.5$  and  $5.5 \pm 0.8$  pups respectively,  $p < 0.05$ ; and  $9.3 \pm 0.3$  and  $9.5 \pm 0.5$  E0.5 zygotes respectively, no significant difference, Mann-Whitney U test). Data were derived from 7 *Tex19.1*<sup>+/-</sup> and 7 *Tex19.1*<sup>-/-</sup> females for 700 pups, and 10 *Tex19.1*<sup>+/-</sup> and 10 *Tex19.1*<sup>-/-</sup> females for zygotes. C. E0.5 zygotes from *Tex19.1*<sup>+/-</sup> and *Tex19.1*<sup>-/-</sup> females. Scale bar 100  $\mu\text{m}$ . D. Chromosome spreads from E0.5 zygotes. The number of chromosomes is indicated, and dotted lines separate chromosomes obtained from adjacent fields of view. DNA was visualised with DAPI. Scale bar 20  $\mu\text{m}$ . E. Quantification of zygote aneuploidy. Aneuploid zygotes are more frequent in *Tex19.1*<sup>-/-</sup> females (24% hypoploid, 17% hyperploid) than 705 *Tex19.1*<sup>+/-</sup> females (7.5% hypoploid, 0% hyperploid, Fisher's exact test,  $p < 0.01$ ). Data are derived from 8 *Tex19.1*<sup>+/-</sup> and 8 *Tex19.1*<sup>-/-</sup> females. F. Chromosome spreads from parthenogenetically activated anaphase II oocytes. The number of chromosomes in each anaphase mass is indicated. Centromeres were visualised by FISH for major satellites (red), and DNA stained with DAPI (cyan). Scale bar 20  $\mu\text{m}$ . G. Quantification of aneuploidy in parthenogenetically activated anaphase 710 II oocytes. Aneuploidy in *Tex19.1*<sup>-/-</sup> parthenogenetic oocytes (32.5% hypoploid, 15% hyperploid) is more frequent than in *Tex19.1*<sup>+/-</sup> parthenogenetic oocytes (17% hypoploid, 0% hyperploid, Fisher's exact test,  $p < 0.01$ ). Data are derived from 5 *Tex19.1*<sup>+/-</sup> and 7 *Tex19.1*<sup>-/-</sup> females. Asterisks indicate  $p < 0.05$  (\*) or  $p < 0.01$  (\*\*), ns indicates no significant difference.

### 715 Figure 2. *Tex19.1*<sup>-/-</sup> Oocytes Mis-segregate Homologous Chromosomes and Prematurely Separate Sister Chromatids During Meiosis I

A. Live imaging of meiosis I in *Tex19.1*<sup>+/-</sup> and *Tex19.1*<sup>-/-</sup> oocytes. Chromatin was visualised with

histone H2B-RFP (red). Examples of a normal *Tex19.1*<sup>+/-</sup> anaphase I oocyte, and a *Tex19.1*<sup>-/-</sup> anaphase I oocyte with lagging chromosomes (arrow). Scale bar 50  $\mu$ m. B. Graph showing the  
720 proportion of anaphase I oocytes with lagging chromosomes. 36% of *Tex19.1*<sup>-/-</sup> anaphase I oocytes but no *Tex19.1*<sup>+/-</sup> anaphase I oocytes contained lagging chromosomes (Fisher's exact test,  $p < 0.05$ ). Data are derived from 6 *Tex19.1*<sup>+/-</sup> and 3 *Tex19.1*<sup>-/-</sup> females across 7 microinjection and imaging sessions, only oocytes where chromosomes remained in the imaging plane throughout the nuclear division were used for this analysis. C. Chromosome spreads from metaphase II oocytes. DNA was  
725 visualised with DAPI (cyan) and centromeres detected by FISH for major satellites (red). The number of chromatids is indicated. An aneuploid *Tex19.1*<sup>-/-</sup> oocyte with 42 chromatids but no overt premature sister chromatid separation (PSCS), and a euploid *Tex19.1*<sup>-/-</sup> oocyte with 40 chromatids and PSCS (arrows) are shown. Scale bar 10  $\mu$ m. D. Graph showing the proportion of aneuploid metaphase II oocytes. 31% of *Tex19.1*<sup>-/-</sup> oocytes were hypoploid and 14% hyperploid compared to  
730 11% hypoploid and 0% hyperploid for *Tex19.1*<sup>+/-</sup> oocytes (Fisher's exact test,  $p < 0.01$ ). Data are derived from 8 *Tex19.1*<sup>+/-</sup> and 12 *Tex19.1*<sup>-/-</sup> females. Asterisks indicate  $p < 0.05$  (\*) or  $p < 0.01$  (\*\*).

### Figure 3. *Tex19.1*<sup>-/-</sup> Oocytes Have Impaired Maintenance of Arm Cohesion

A. Chromosome spreads from adult prometaphase I oocytes. Centromeres are labelled with ACA  
735 antibodies (red), DNA is stained with DAPI (cyan). Arrows indicate bivalents linked by terminal chiasmata. Scale bar 10  $\mu$ m. B. Quantification of chiasmata in prometaphase I oocytes. *Tex19.1*<sup>-/-</sup> oocytes have  $24.9 \pm 1.7$  chiasmata, fewer than the  $27.0 \pm 2.3$  in *Tex19.1*<sup>+/-</sup> control oocytes ( $p < 0.01$ , Mann-Whitney U test). C. Chromosome spreads from E18.5 foetal pachytene oocytes. Synaptonemal complex is labelled with anti-SYCP3 antibodies (red), late recombination foci with  
740 anti-MLH1 antibodies (green) and DNA is stained with DAPI (blue). Scale bar 10  $\mu$ m. D. Quantification of MLH1 foci in E18.5 foetal pachytene oocytes. *Tex19.1*<sup>+/-</sup> oocytes possess  $22.9 \pm 5.2$  MLH1 foci, similar to the  $22.4 \pm 4.5$  in *Tex19.1*<sup>-/-</sup> oocytes (no significant difference, Mann



Whitney U test). Data are derived from 3 *Tex19.1*<sup>+/±</sup> and 3 *Tex19.1*<sup>-/-</sup> fetuses E. Distribution of chiasmata in adult oocytes. The proportion of univalent chromosomes (no chiasmata) is not significantly changed (0/480 chromosome pairs for *Tex19.1*<sup>+/±</sup>, 1/540 for *Tex19.1*<sup>-/-</sup>), but *Tex19.1*<sup>-/-</sup> oocytes have fewer bivalents with multiple chiasmata (169/480 for *Tex19.1*<sup>+/±</sup>, 133/540 for *Tex19.1*<sup>-/-</sup>, p<0.01, Fisher's exact test). Data are derived from 7 *Tex19.1*<sup>+/±</sup> and 5 *Tex19.1*<sup>-/-</sup> females. F, G. Chiasma and MLH1 focus position relative to the centromere. Bivalents/axes with a single chiasma/MLH1 focus were scored. Although MLH1 focus position is similar in *Tex19.1*<sup>+/±</sup> and *Tex19.1*<sup>-/-</sup> foetal oocytes, there are more bivalents with terminal chiasmata (arrows in A) in *Tex19.1*<sup>-/-</sup> adult oocytes (13%) than in *Tex19.1*<sup>+/±</sup> controls (5%) (p<0.01, Fisher's exact test). Asterisks indicate p<0.01 (\*\*), ns indicates no significant difference. For beeswarm plots, horizontal lines indicate medians. H. Prometaphase I chromosome spreads immunostained with anti-centromeric antibodies (ACA, red) to visualise centromeres and DAPI (cyan) to visualise DNA. Brightest point projections after deconvolution are shown. Scale bar 1 µm. I. Boxplot showing sister centromere separation at prometaphase I. Mean separation is 0.637 ± 0.007 µm in *Tex19.1*<sup>+/±</sup> oocytes, and 0.626 ± 0.007 µm in *Tex19.1*<sup>-/-</sup> oocytes (not significantly different, Student's t-test).

**Figure 4. Ectopic Expression of *TEX19* Promotes Sister Chromatid Cohesion in Mitotic Somatic Cells**

A, B. Photographs (A) and quantification (B) of sister chromatid separation in HEK293T cells. Chromosome spreads from cells treated as described for panels A and B, were classified as having separated sister chromatids if most chromosomes had a visible gap between most chromosome arms. Examples of separated and adjoined sister chromatids are shown, higher magnification images of the boxed chromosomes are shown as insets. Scale bar 10 µm. Scoring was performed blind on images with coded filenames, quantification reflects four independent experiments with 2 different slides scored for each condition in each experiment, n indicates the total number of

chromosome spreads. 67% of metaphase spreads cells transfected with *TEX19* had closed chromosome arms compared to 33% of controls ( $p < 0.01$ , Fisher's exact test). Asterisks indicate  $p < 0.01$  (\*\*). C, D: Representative Western blots (C) and quantification (D) of three replicates determining the abundance of cohesin subunits (AcSMC3, SMC3, RAD21, SMC1, SA2) in chromatin from HEK293T cells. Cells were transfected with either *TEX19* or empty vector, synchronised with a double thymidine block then released for 4 hours to enrich for cells in G2/M. Cohesin abundance was normalised to histone H3, and quantified relative to empty vector transfections. Expression of *TEX19* induces a 3.3-fold increase in chromatin-associated AcSMC3 ( $p < 0.01$ , t-test). Note that although the histone H3 and cohesin bands can be different widths, each pair of histone H3 and cohesin bands are from the same gel lane; the high concentration of histones in the chromatin preps causes the sample to spread laterally in the gel at low molecular weights.

## 780 **Figure 5. *TEX19.1* Inhibits the Activity of the E3 Ubiquitin Ligase UBR2 Towards Type II N-end Rule Substrates**

A. Colloidal blue-stained anti-YFP immunoprecipitates from cytoplasmic lysates of HEK293T cells stably expressing *TEX19.1*-YFP or YFP alone. Molecular weight (MW) markers are indicated. The ~220 kD band co-immunoprecipitating stoichiometrically with *TEX19.1*-YFP was identified by mass spectrometry as UBR2 (44 matching peptides covering 25% of UBR2, probability of random match  $< 10^{-25}$ ). B. Anti-YFP immunoprecipitates as described for panel A Western blotted for YFP and endogenous UBR2. C. N-end rule reporters assays. Stable Flp-In-293 cell lines expressing GFP with either a type I or type II N-end rule degron or a ubiquitin fusion (Ub-GFP) at its amino terminus were transiently transfected with *Tex19.1* expression plasmid or empty vector. GFP reporter fluorescence was assayed by flow cytometry relative to a M-GFP Flp-In-293 cell line. *Tex19.1* increases stability of the type II N-end rule reporter by 58% ( $n=3$ ,  $p < 0.01$ , Student's t-test). D. As panel C except STREP-tagged *TEX19.1* expression plasmids were used and GFP reporter



stability was assayed by Western blotting against GFP using lamin B as a loading control. E. Peptide pull-down assays for endogenous UBR2 from HEK293T cells transiently transfected with  
795 STREP-tagged TEX19.1 or empty vector. Cell lysate inputs were mixed with agarose beads covalently linked to peptides carrying either type I, type II or negative control (Con) N-terminal residues and the amount of UBR2 bound to each type of bead was assayed by Western blotting. Data shown are representative of three replicate experiments.

800 **Figure 6. Proteasome-Dependent and *Ubr2*-Dependent Pathways Regulate AcSMC3-Containing Cohesin in Mammalian Somatic Cells**

A, B: Representative Western blots (A) and quantification (B) of three replicates determining the abundance of AcSMC3 and SMC3 cohesin subunits in chromatin from HEK293T cells treated with the proteasome inhibitor MG132. Cells were transfected with either *TEX19* or empty vector before  
805 treatment with either MG132, or with DMSO as a vehicle control. Cohesin abundance was normalised to histone H3, and quantified relative to empty vector transfections. Expression of *TEX19* induces a 1.6-fold increase in chromatin-associated AcSMC3 ( $p < 0.05$ , t-test), but this effect is abolished in the presence of MG132. C, D. Representative Western blots (C) and quantification (D) from four pairs of *Ubr2*<sup>+/+</sup> and *Ubr2*<sup>-/-</sup> mice determining the abundance of cohesin subunits  
810 (AcSMC3, SMC3, RAD21, SMC1, SA2) in spleen chromatin. Cohesin abundance was normalised to histone H3, and quantified relative to *Ubr2*<sup>+/+</sup> mice. *Ubr2*<sup>-/-</sup> spleens have a 2.1-fold increase in the amount of chromatin-associated AcSMC3 ( $p < 0.05$ , t-test). Asterisk indicates  $p < 0.05$  (\*).

815 **Figure 7. *Tex19.1*<sup>-/-</sup> Oocytes Have Reduced Levels of Chromatin-Associated AcSMC3 Cohesin**

A, C. *Tex19.1*<sup>+/±</sup> and *Tex19.1*<sup>-/-</sup> prometaphase I chromosome spreads immunostained with ACA (green), DAPI (blue) and either anti-REC8 (A, red) or anti-AcSMC3 (C, red) antibodies to visualise

cohesin. Example individual bivalents (boxes) are magnified and shown in the right hand panels. Single channel images of AcSMC3 and REC8 are also shown in greyscale. Scale bars 10  $\mu$ m. B, D.

820 Quantification of anti-REC8 (B) and anti-AcSMC3 (D) immunostaining in prometaphase I oocyte chromosomes. Individual bivalents were distinguished by DAPI staining, and total cohesin immunostaining on each bivalent was measured relative to ACA. The median of the ratios for each oocyte is plotted. Data are derived from 7 *Tex19.1*<sup>+/-</sup> females, and 5 *Tex19.1*<sup>-/-</sup> females for REC8, and from 4 *Tex19.1*<sup>+/-</sup> females, and 4 *Tex19.1*<sup>-/-</sup> females for AcSMC3. Horizontal lines indicate

825 medians, asterisks indicate  $p < 0.01$  (\*\*), ns indicates no significant difference.

### Figure 8. Regulation of AcSMC3 By TEX19.1 and UBR2

Model outlining how TEX19.1 and UBR2 might influence chromosome-associated AcSMC3. In mitotic somatic cells, UBR2 negatively regulates AcSMC3 directly or indirectly. In *Ubr2*<sup>-/-</sup> spleen

830 this negative regulation is lost and AcSMC3 abundance increases. Expression of *Tex19.1*, for example when ectopically expressed in HEK293T cells or endogenously expressed in meiotic oocytes, results in the formation of a TEX19.1-UBR2 complex that inhibits the activity of UBR2 towards some N-end rule substrates and results in increased AcSMC3 abundance. In *Tex19.1*<sup>-/-</sup> oocytes, the inhibitory effect of TEX19.1 on UBR2 is lost, which could allow negative regulation of

835 AcSMC3 by UBR2 to contribute to the reduced levels of AcSMC3 in prometaphase I *Tex19.1*<sup>-/-</sup> oocyte chromosomes.

## Supplementary Figure Legends

### 840 **Supplementary Figure S1. Oogenesis and Meiotic Prophase Proceed Normally in *Tex19.1*<sup>-/-</sup> Female Mice**

A. Haematoxylin-stained paraffin sections from *Tex19.1*<sup>+/+</sup> and *Tex19.1*<sup>-/-</sup> adult ovaries. No gross abnormalities were evident in *Tex19.1*<sup>-/-</sup> ovaries. Primary, secondary, and antral follicles containing growing oocytes were observed *Tex19.1*<sup>+/+</sup> and *Tex19.1*<sup>-/-</sup> ovaries. Scale bar 1 mm. B. 845 Immunostained E18.5 chromosome spreads from *Tex19.1*<sup>+/±</sup> and *Tex19.1*<sup>-/-</sup> oocytes showing chromosome synapsis. Axial elements and transverse filaments of the synaptonemal complex were stained with anti-SYCP3 (green) and anti-SYCP1 (red) antibodies respectively. Synapsis is indicated by co-localization of these markers. Scale bar 10 μm. C. Quantification of synapsis in E18.5 pachytene chromosome spreads. Asynapsis was present in 24/184 pachytene *Tex19.1*<sup>+/±</sup> 850 oocytes and 28/204 pachytene *Tex19.1*<sup>-/-</sup> oocytes (no significant difference, Fisher's exact test). Data are derived from 5 *Tex19.1*<sup>+/±</sup> and 5 *Tex19.1*<sup>-/-</sup> foetuses. D. SYCP3-positive nuclei in E18.5 oocyte chromosome spreads were classified into substages of meiotic prophase based on SYCP3 and SYCP1 immunostaining. The distribution of prophase substages was not significantly different between *Tex19.1*<sup>+/±</sup> and *Tex19.1*<sup>-/-</sup> oocytes (Fisher's exact test). E. Chromosome axis lengths in 855 pachytene nuclei from E18.5 foetal oocyte chromosome spreads as determined by anti-SYCP3 and anti-SYCP1 immunostaining. Chromosomes are ordered on the basis of size. 20 nuclei were scored for each foetus, and the mean axis length for each chromosome is plotted. Data for three *Tex19.1*<sup>+/±</sup> and three *Tex19.1*<sup>-/-</sup> foetuses are shown. *Tex19.1*<sup>+/±</sup> and *Tex19.1*<sup>-/-</sup> axis lengths are not significantly different for any chromosome (t-test). F. Chromosome spreads from prometaphase I *Tex19.1*<sup>+/±</sup> and 860 *Tex19.1*<sup>-/-</sup> oocytes 3 hours post-GVBD. DNA is stained with DAPI. Scale bar 10 μm. G. Quantification of number of prometaphase I oocytes containing univalents. *Tex19.1*<sup>+/±</sup> and *Tex19.1*<sup>-/-</sup> oocytes had similar frequencies of oocytes containing univalents (1/59 and 1/72 respectively, no significant difference, Fisher's exact test). ns indicates no significant difference. Data are derived

from 3 *Tex19.1*<sup>+/-</sup> and 3 *Tex19.1*<sup>-/-</sup> female mice.

865

### **Supplementary Figure S2. Adult *Tex19.1*<sup>-/-</sup> Oocytes Progress Through Meiosis I With Normal Kinetics**

A. Live imaging of meiosis I in *Tex19.1*<sup>+/-</sup> and *Tex19.1*<sup>-/-</sup> oocytes. Chromatin was visualised with histone H2B-RFP (red). Time relative to GVBD in minutes is indicated in the top left corner of each image. Data are derived from 6 *Tex19.1*<sup>+/-</sup> and 3 *Tex19.1*<sup>-/-</sup> females across 7 microinjection and imaging sessions. Scale bar 50  $\mu$ m. B. Beeswarm plot showing the time to polar body extrusion relative to GVBD in *Tex19.1*<sup>+/-</sup> and *Tex19.1*<sup>-/-</sup> oocytes. Median values are indicated with a horizontal line, there is no significant difference (ns) between *Tex19.1*<sup>+/-</sup> and *Tex19.1*<sup>-/-</sup> oocytes (Mann-Whitney U test).

875

### **Supplementary Figure S3. Distribution of Chromatid Number in *Tex19.1*<sup>-/-</sup> Metaphase II Oocytes**

Histogram showing the percentage of *Tex19.1*<sup>+/-</sup> and *Tex19.1*<sup>-/-</sup> metaphase II oocytes analysed in Figure 2C,D that contained the indicated number of chromatids. Note the presence of aneuploid oocytes with odd numbers of chromatids indicating potential premature segregation of sister chromatids. Of the 7 hyperploid *Tex19.1*<sup>-/-</sup> oocytes, 2 exhibited cytologically detectable premature separation of sister chromatids, 4 had at least 21 dyads exhibiting intact sister chromatid cohesion indicating mis-segregation of homologs had occurred, and one hyperploid *Tex19.1*<sup>-/-</sup> oocyte exhibited both these traits.

885

### **Supplementary Figure S4. Ectopic Expression of *TEX19* in HEK293T Cells Does Not Alter Total Cohesin Levels in G2/M or Chromatin-Associated Cohesin in S Phase.**

A. Western blot showing that transfection of *TEX19* expression constructs into HEK293T cells results in detectable expression of TEX19 protein. Results are representative of three independent transfections. B. Flow cytometry showing the DNA content (propidium iodide fluorescence) in

HEK293T cell populations transfected with either empty vector or *TEX19*, synchronised with a double thymidine block, and released for either 2 or 4 hours into fresh media to enrich for S phase and G2/M populations respectively. C, D. Representative Western blots (C) and quantification (D) of three replicates determining the abundance of AcSMC3 and SMC3 cohesin subunits in whole cell lysates from HEK293T cells transfected with *TEX19* or empty vector. Cells were synchronised with a double thymidine block and released for 4 hours to enrich for G2/M cells. Histone H3 was used as a loading control. Cohesin abundance was normalised to histone H3, and quantified relative to empty vector transfections. Acetylated SMC3 and SMC3 abundance is not significantly different between cells transfected with *TEX19* and controls (t-test). E, F. Representative Western blots (E) and quantification (F) of three replicates determining the abundance of cohesin subunits (AcSMC3, SMC3, RAD21, SMC1, SA2) in chromatin from HEK293T cells transfected with *TEX19* or empty vector. Cells were synchronised with a double thymidine block and released for 2 hours to enrich for S phase cells. Histone H3 was used as a loading control. Cohesin abundance was normalised to histone H3, and quantified relative to empty vector transfections. The abundance of chromatin-associated cohesin subunits is not significantly different between cells transfected with *TEX19* and controls (t-test)

### **Supplementary Figure S5. Human *TEX19* Inhibits N-end Rule Degradation**

A. N-end rule GFP reporters are sensitive to proteasome inhibition. Ubiquitin fusion constructs that generate GFPs possessing N-end rule degrons (leucine for type II-GFP, arginine for type I-GFP) or methionine (M-GFP) at their N-termini, or a non-cleavable Ub-GFP fusion construct, were stably integrated into Flp-In-293 cells. The abundance of the GFP reporters in these cell lines cultured in the presence or absence of the proteasome inhibitor MG132 was assessed by Western blotting using anti-GFP antibodies. Anti-lamin B antibodies were used as a loading control. B. Human *TEX19* inhibits degradation of N-end rule GFP reporters. Flp-In-293 cells stably expressing M-GFP, type II degron-GFP, type I degron-GFP or a non-cleavable Ub-GFP fusion constructs were transiently

transfected with a human *TEX19* expression construct or an empty CMV-containing vector, then assayed for GFP fluorescence using a flow cytometer 24 hours post-transfection. Results are derived from three independent replicates. GFP fluorescence was normalised to M-GFP, and graphs  
920 indicate mean  $\pm$  standard error for three replicates. \* indicates  $p < 0.05$ , \*\* indicates  $p < 0.01$ .

### **Supplementary Figure S6. *Ubr2*<sup>-/-</sup> Spleen Histology and Cell Cycle Profile**

A. Haematoxylin and eosin stained paraffin sections of *Ubr2*<sup>+/+</sup> and *Ubr2*<sup>-/-</sup> spleen. Loss of *Ubr2* does not dramatically alter the histological appearance or cell type composition of the spleen. Scale  
925 bar 100  $\mu$ m. B. Flow cytometry of *Ubr2*<sup>+/+</sup> and *Ubr2*<sup>-/-</sup> spleens. Loss of *Ubr2* does not grossly perturb the cell cycle distribution in this tissue.

### **Supplementary Figure S7. Chromatin-Associated Acetylated SMC3 is not Detectably Altered in *Ubr2*<sup>-/-</sup> Thymus**

930 A, B. Representative Western blots (A) and quantification (B) from three pairs of *Ubr2*<sup>+/+</sup> and *Ubr2*<sup>-/-</sup> mice for the abundance of cohesin subunits (AcSMC3, SMC3, RAD21, SMC1, SA2) in thymus chromatin. Histone H3 was used as a loading control. Cohesin abundance was normalised to histone H3, and quantified relative to *Ubr2*<sup>+/+</sup> mice. The abundance of cohesin subunits in the thymus of *Ubr2*<sup>-/-</sup> mice was not significantly different from *Ubr2*<sup>+/+</sup> controls (t-test).

935

**Figure 1**

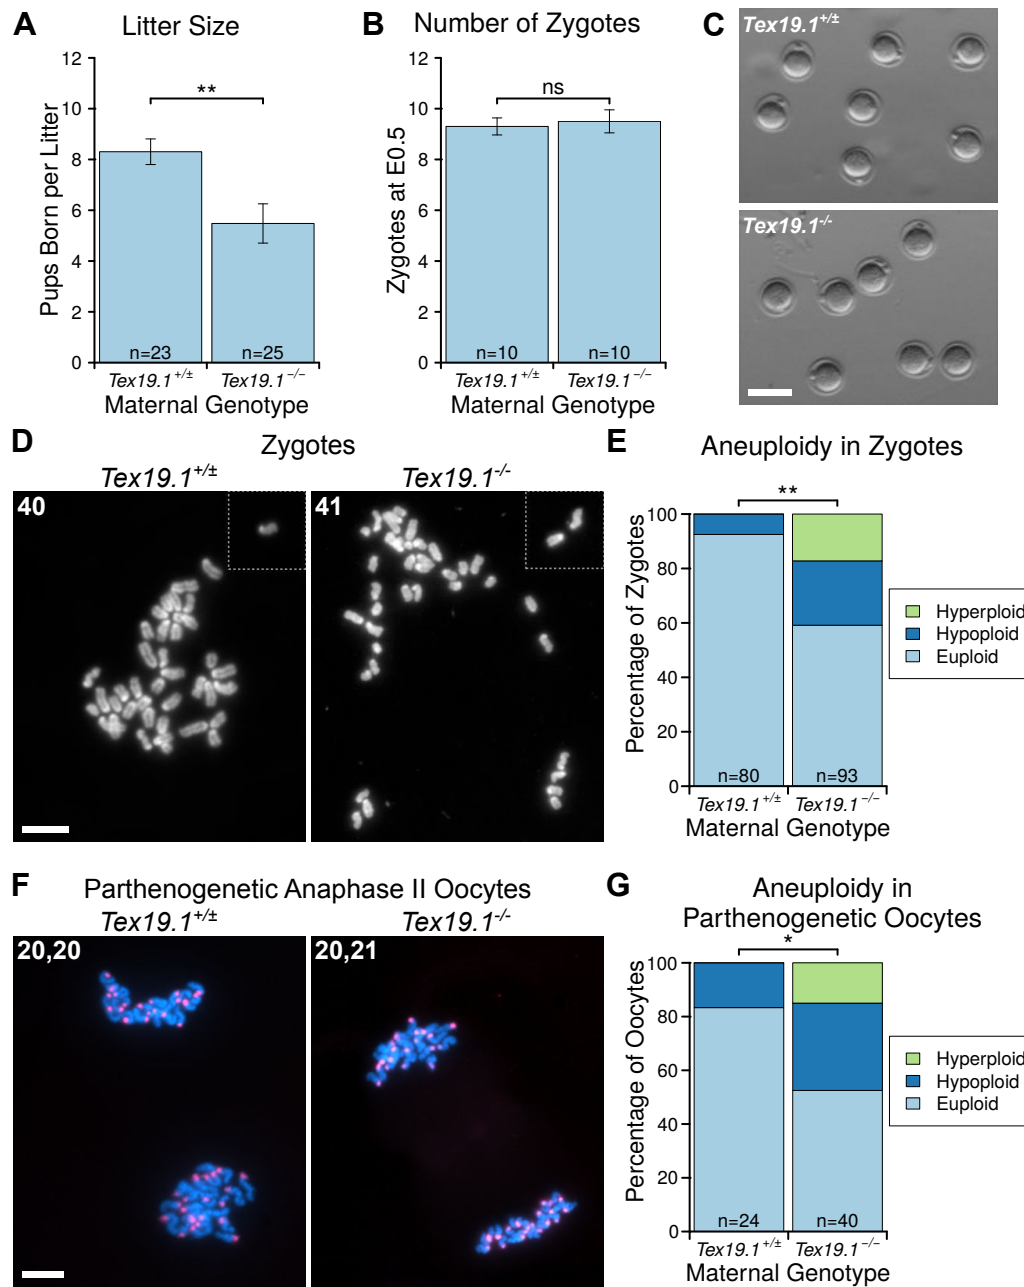

**Figure 2**

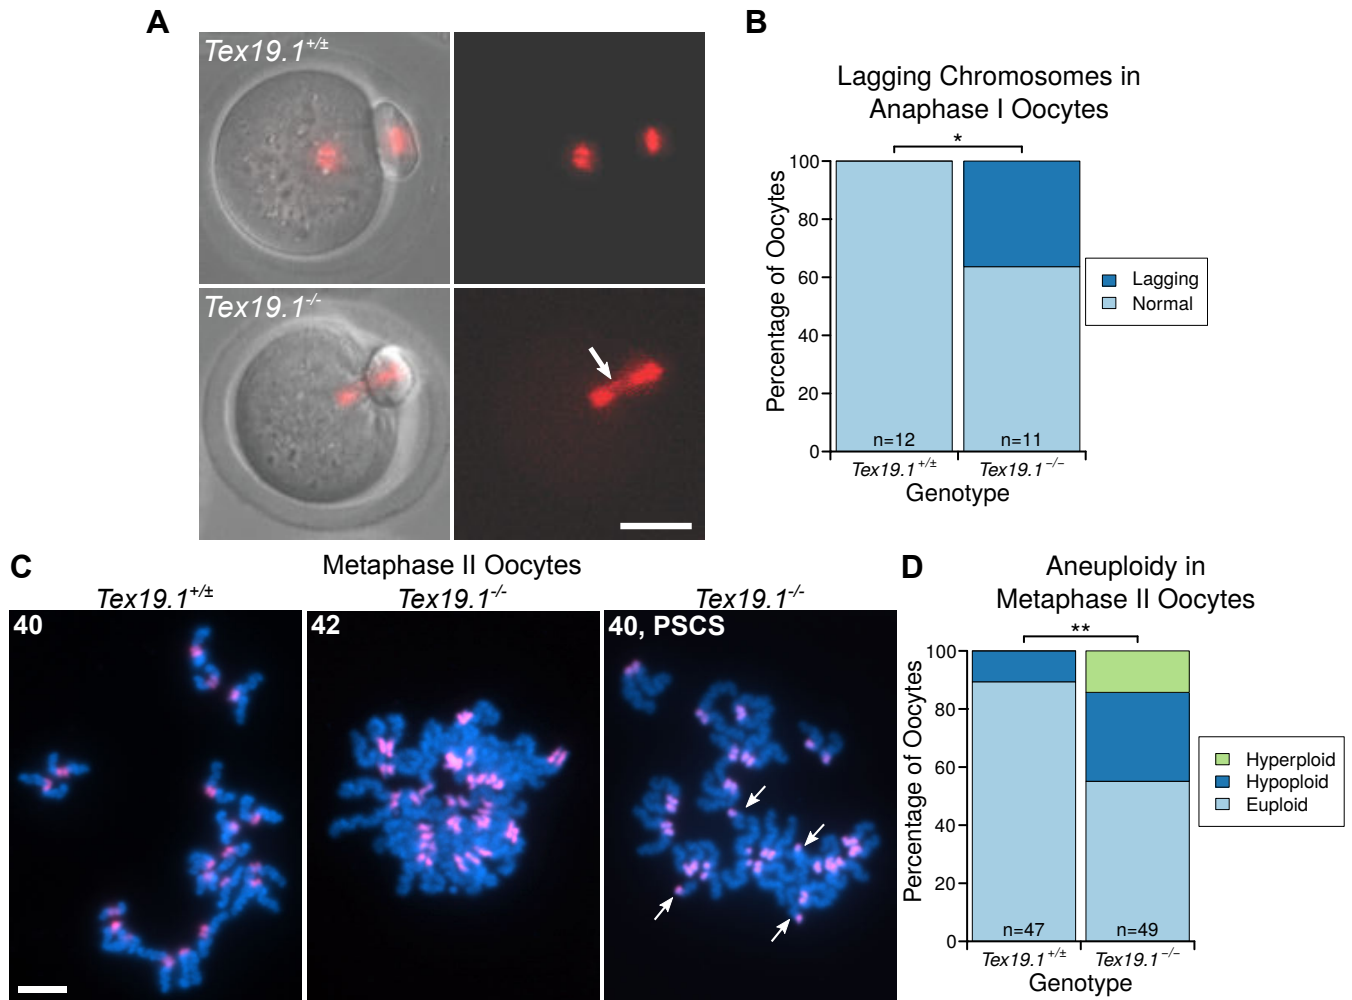



**Figure 3**

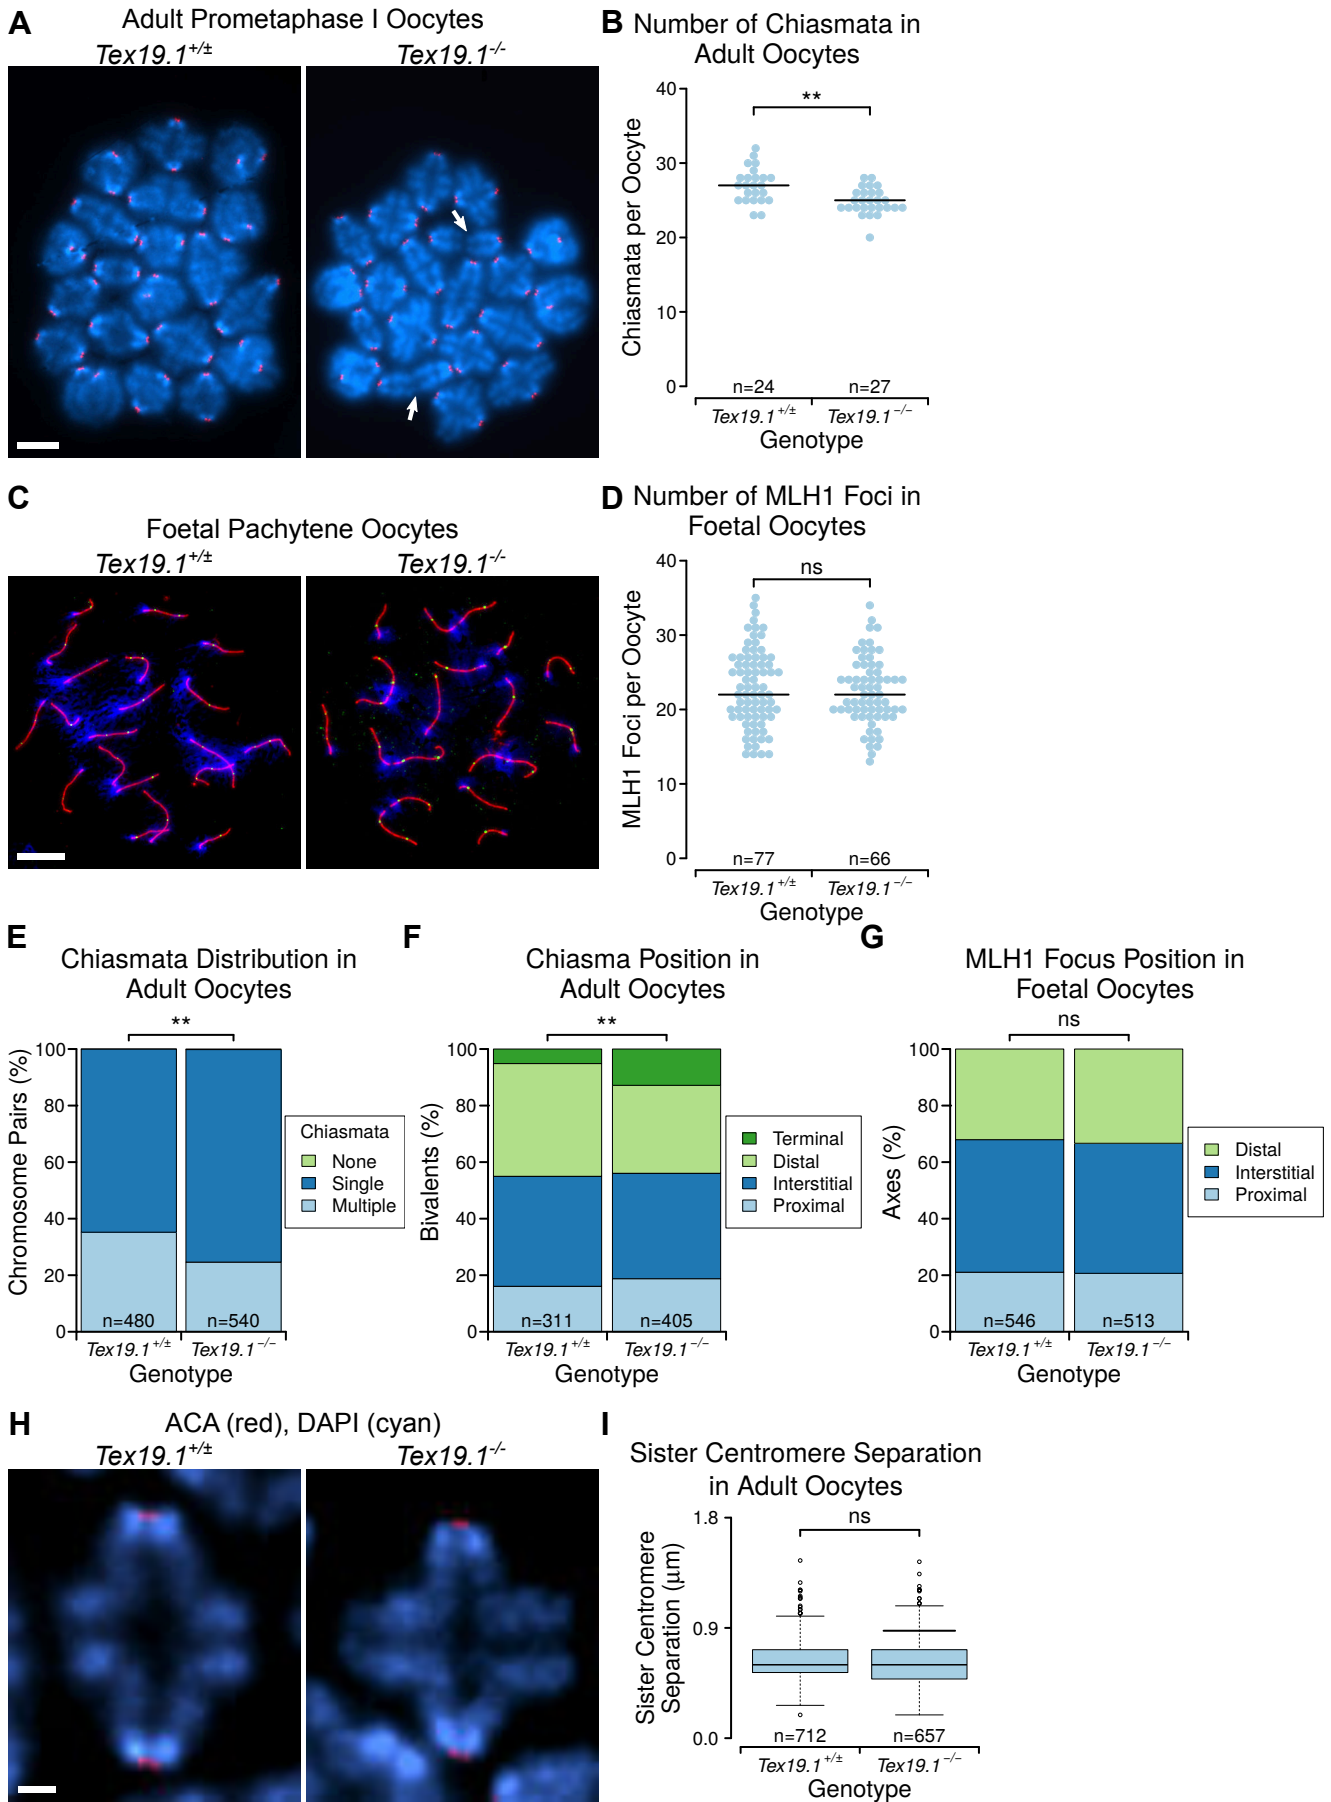

**Figure 4**

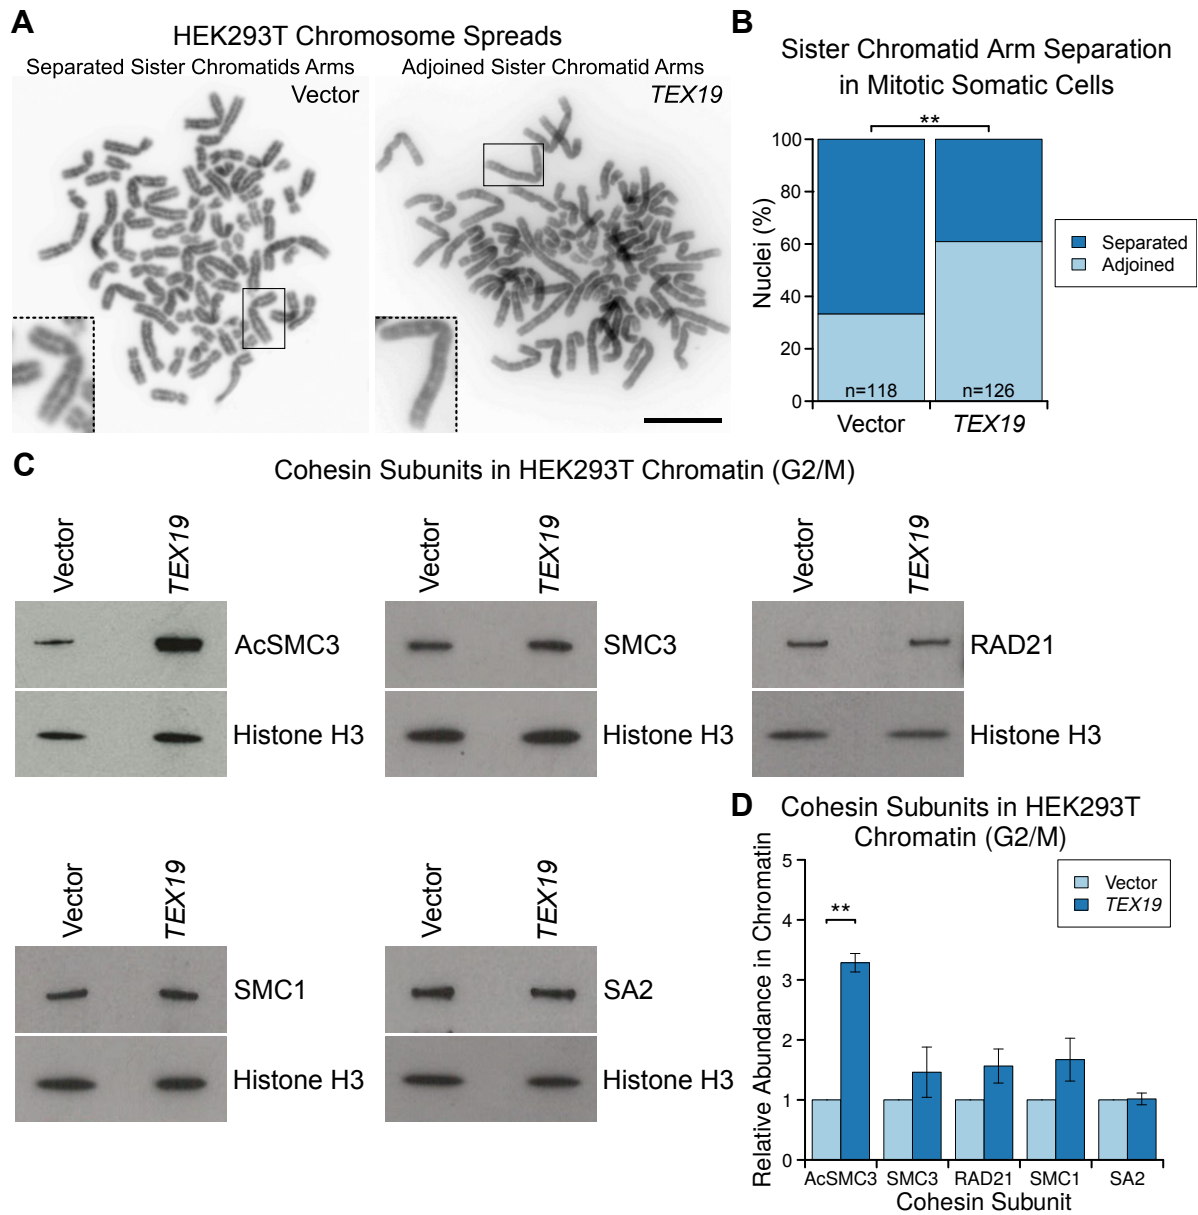

**Figure 5**

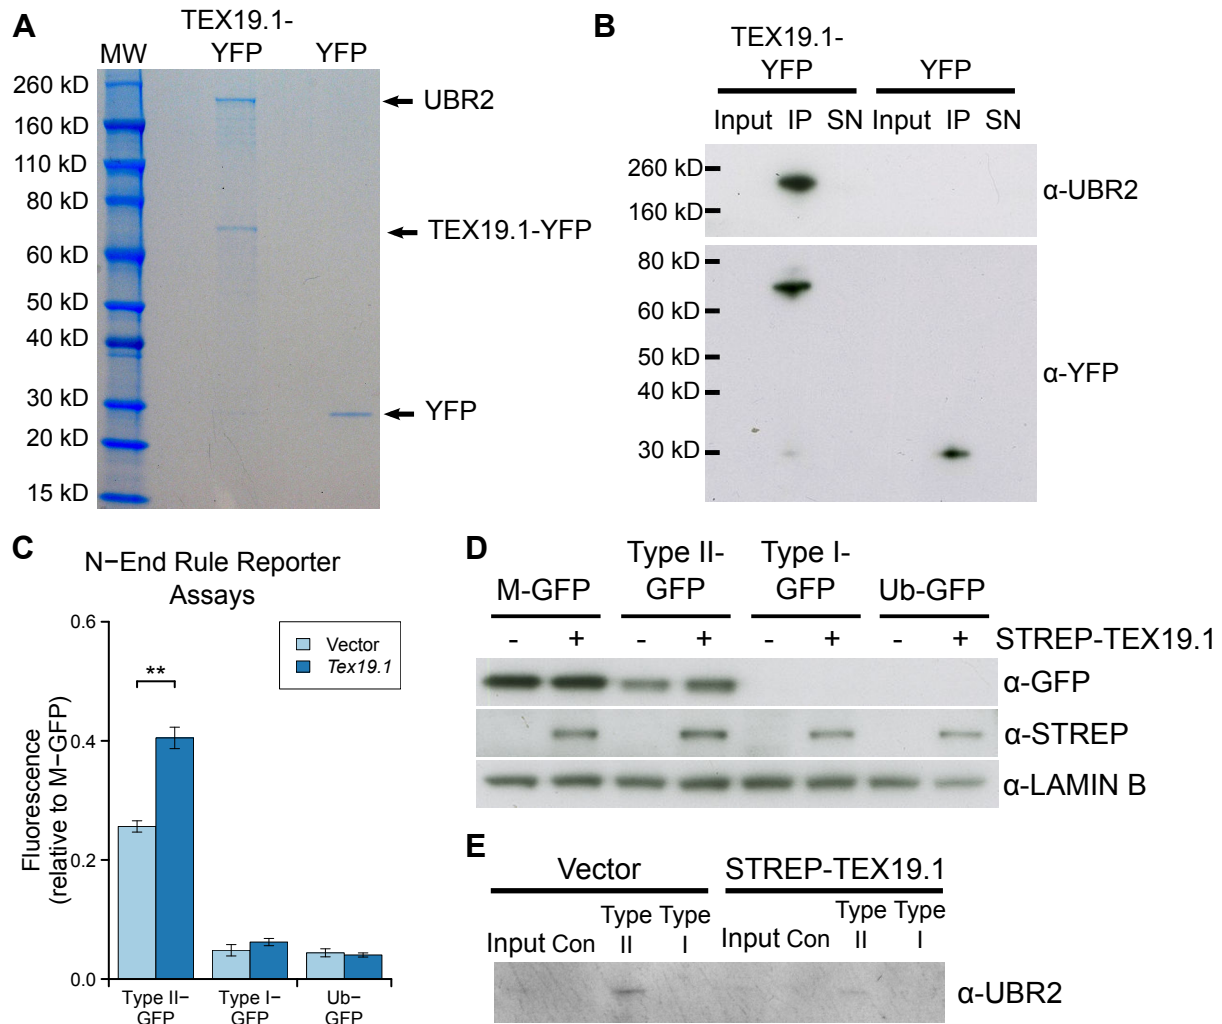

**Figure 6**

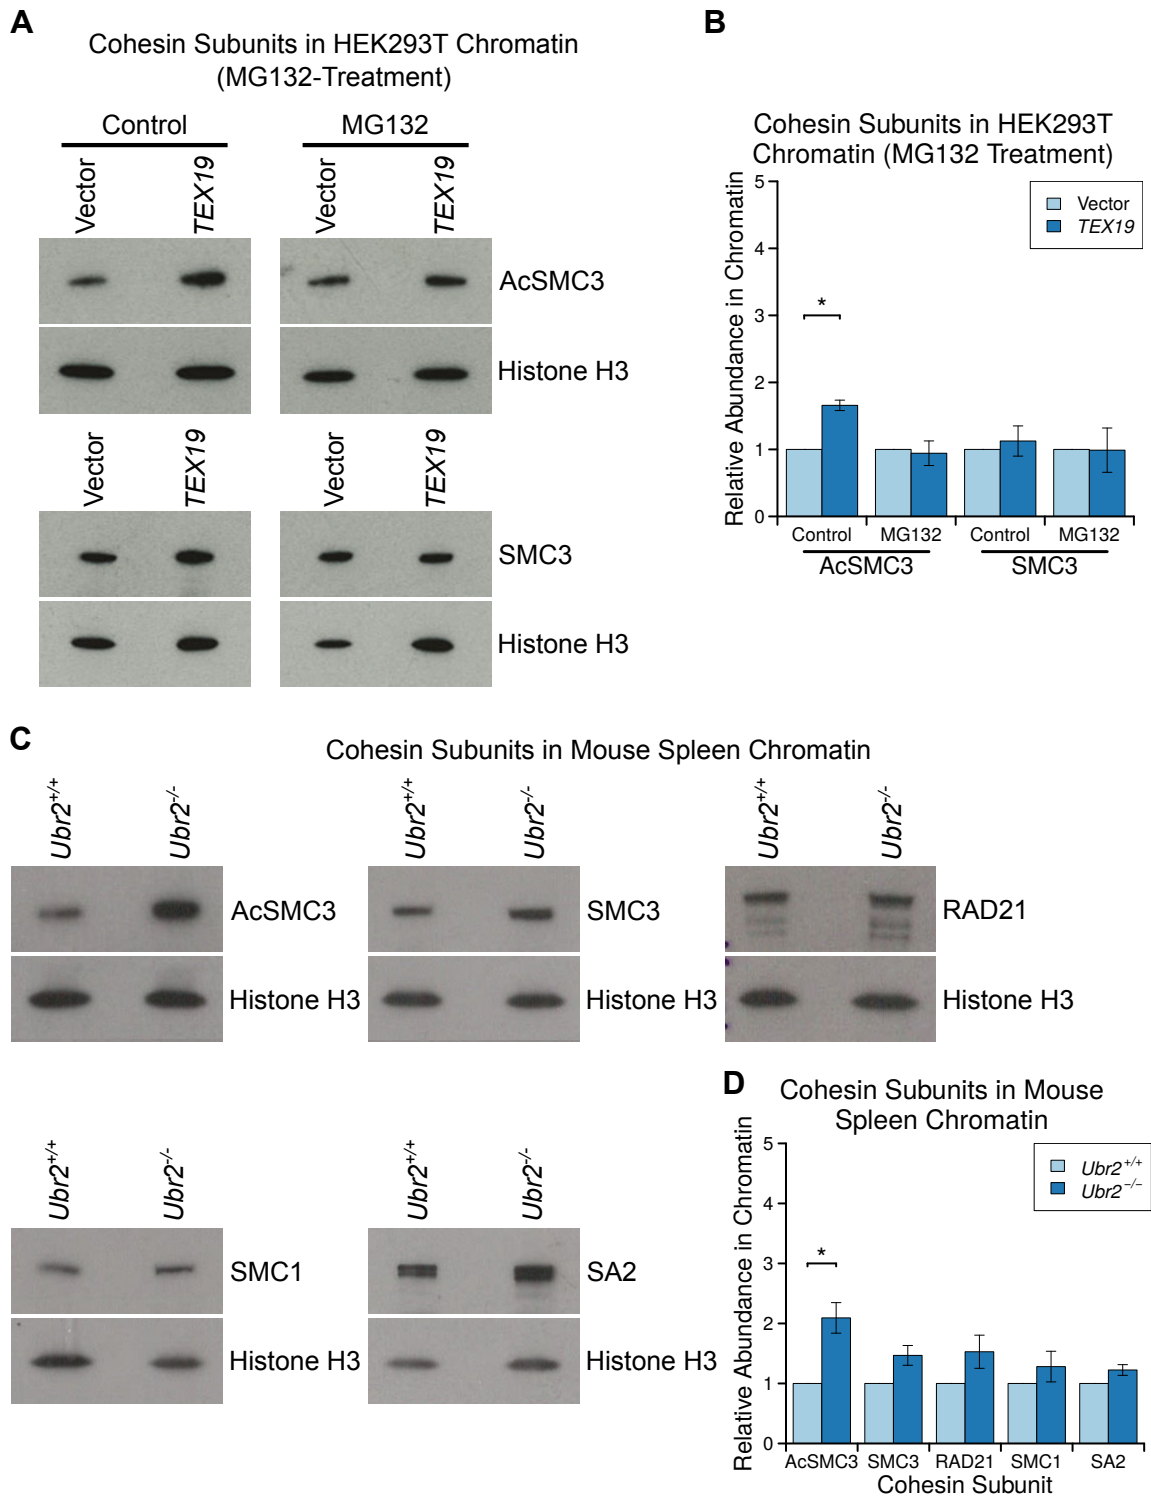

**Figure 7**

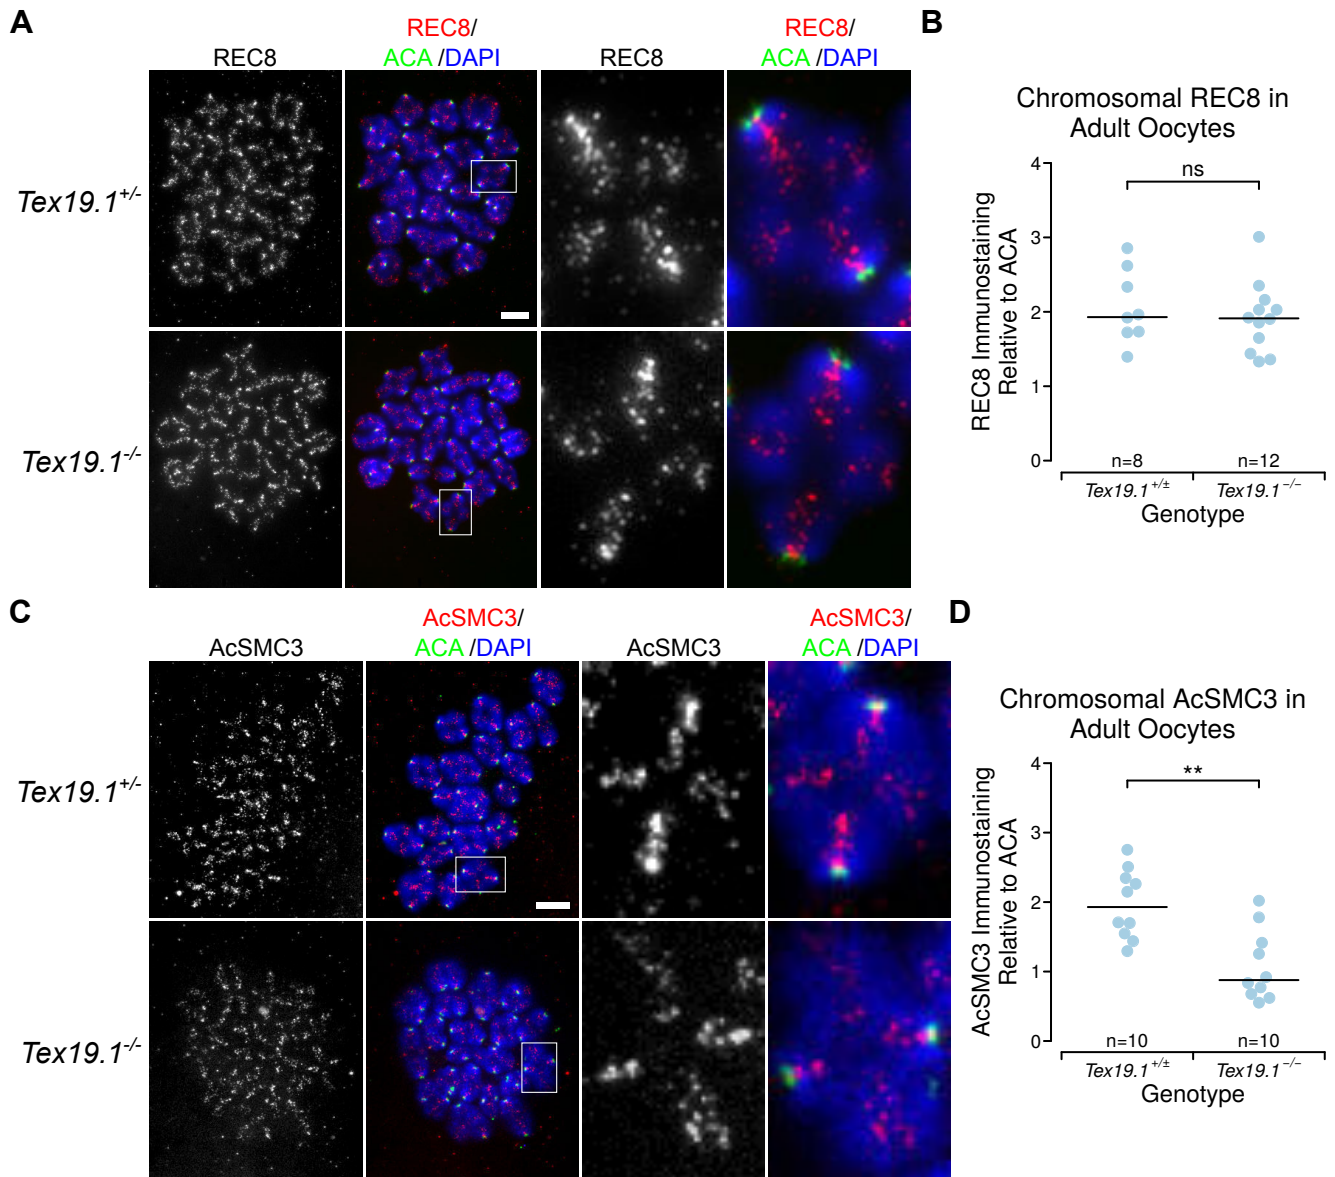

**Figure 8**

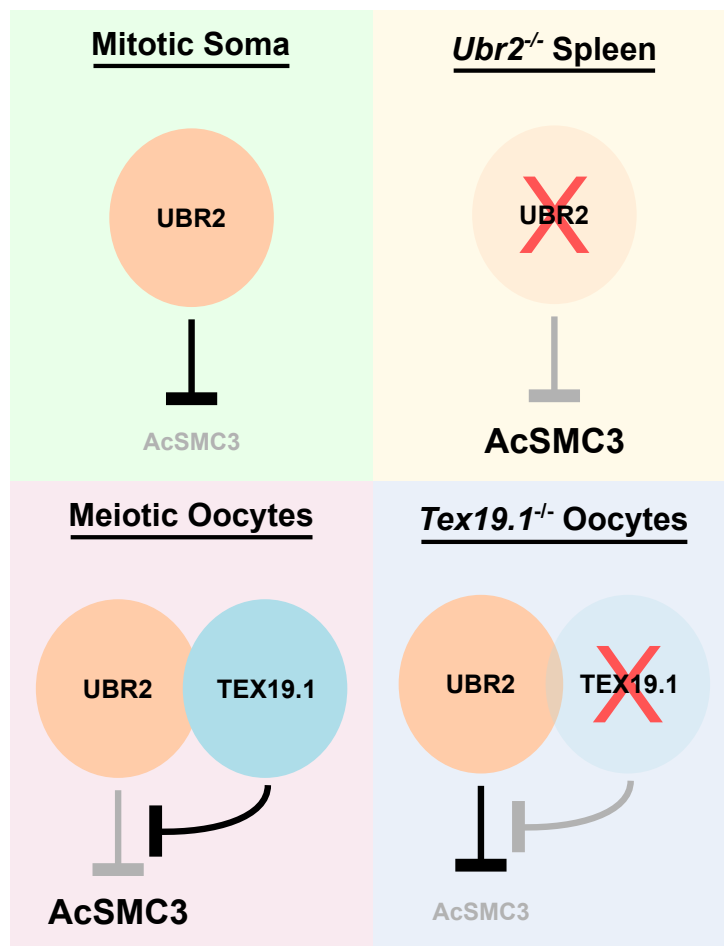



**Supplementary Figure S1**

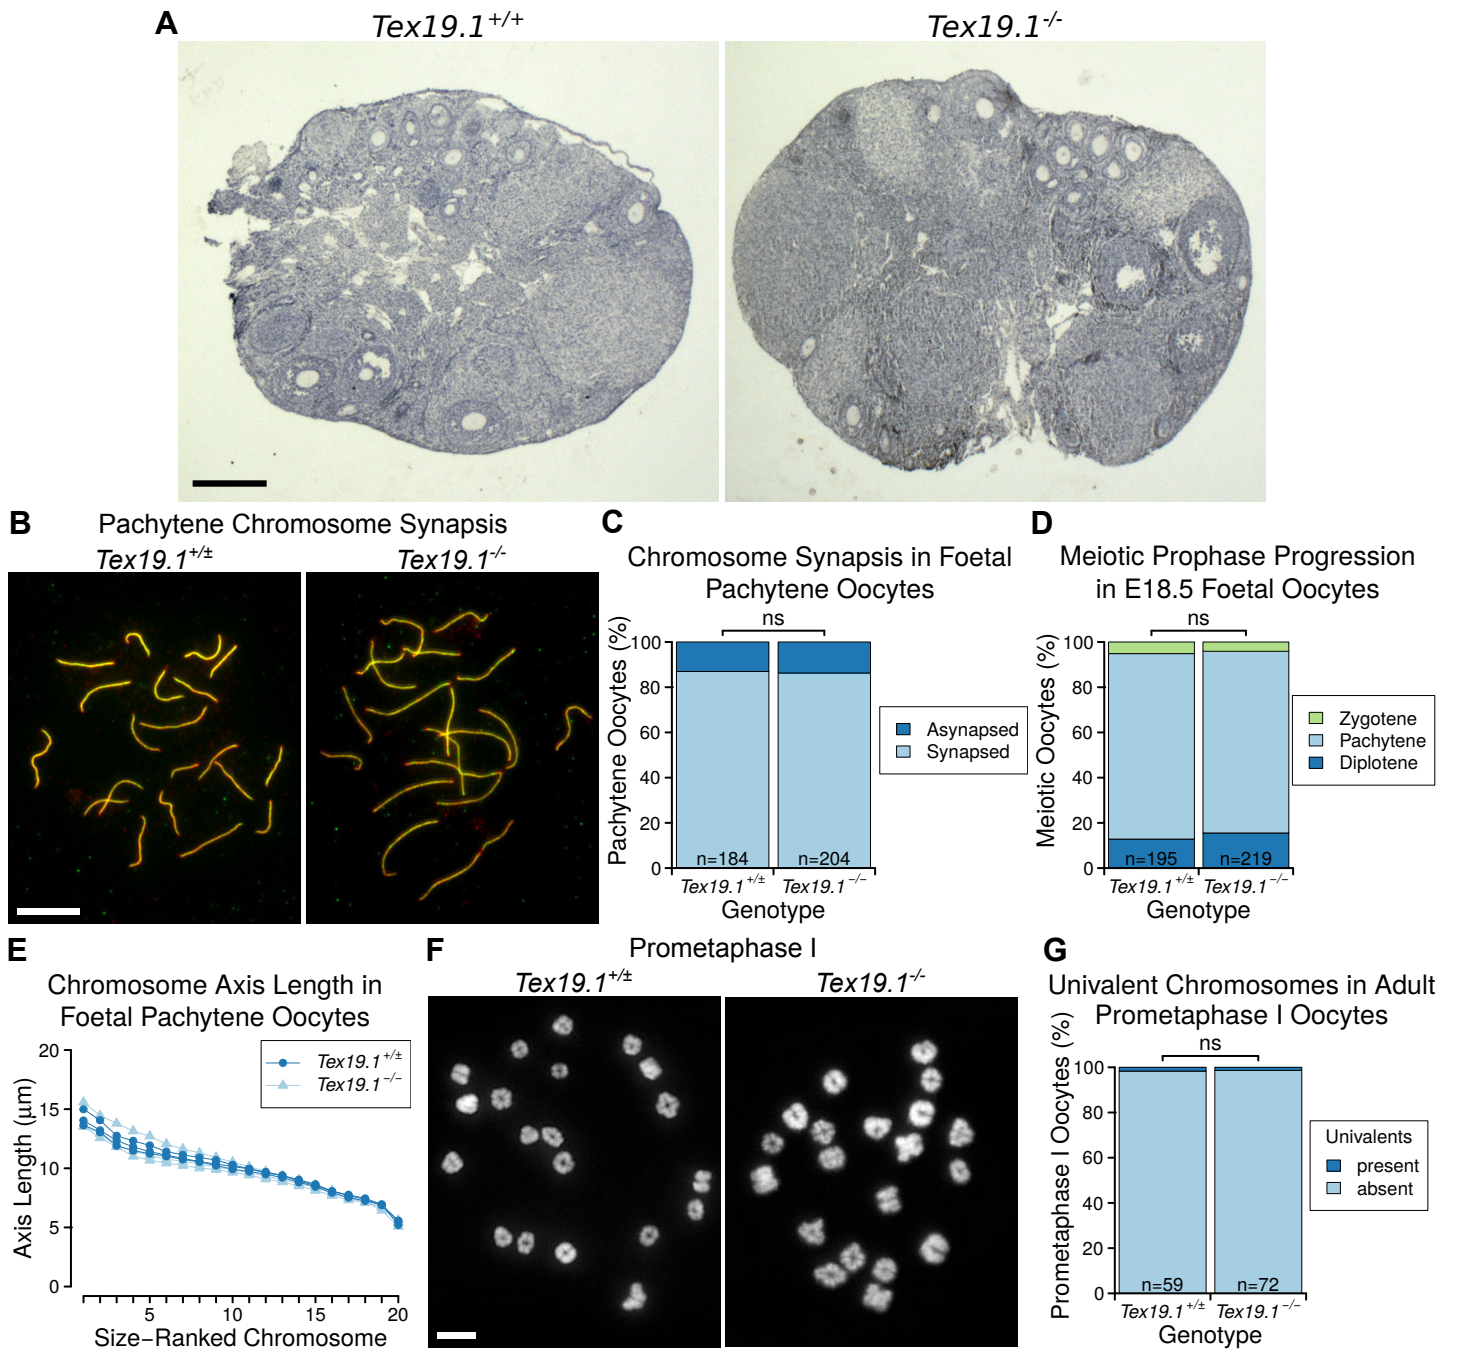

## Supplementary Figure S2

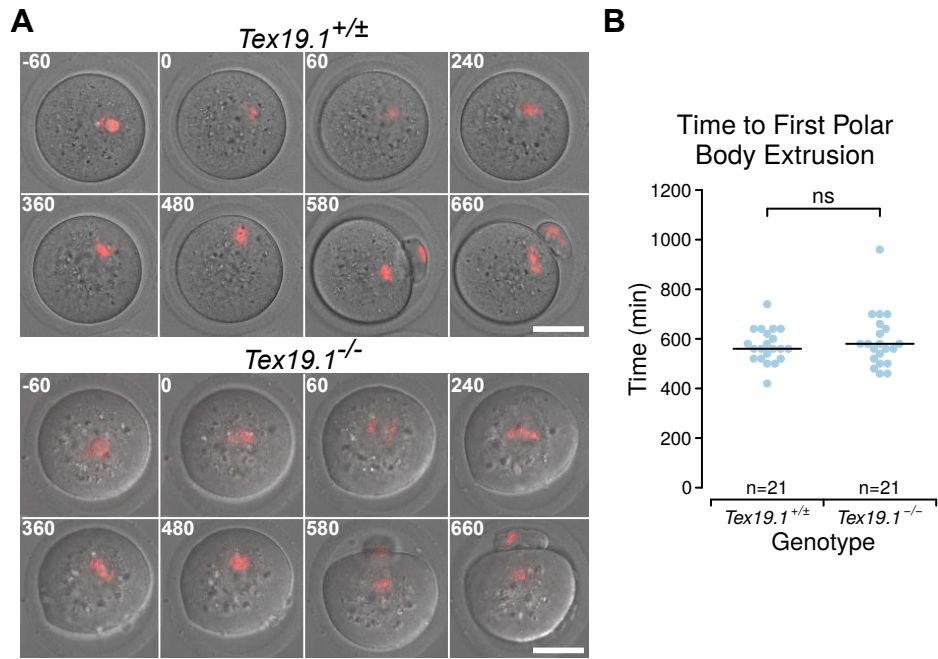



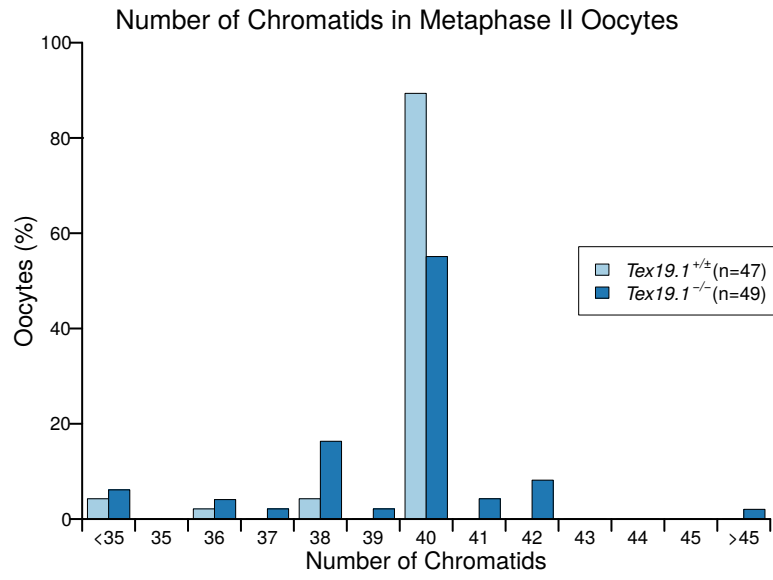

Supplementary Figure S4

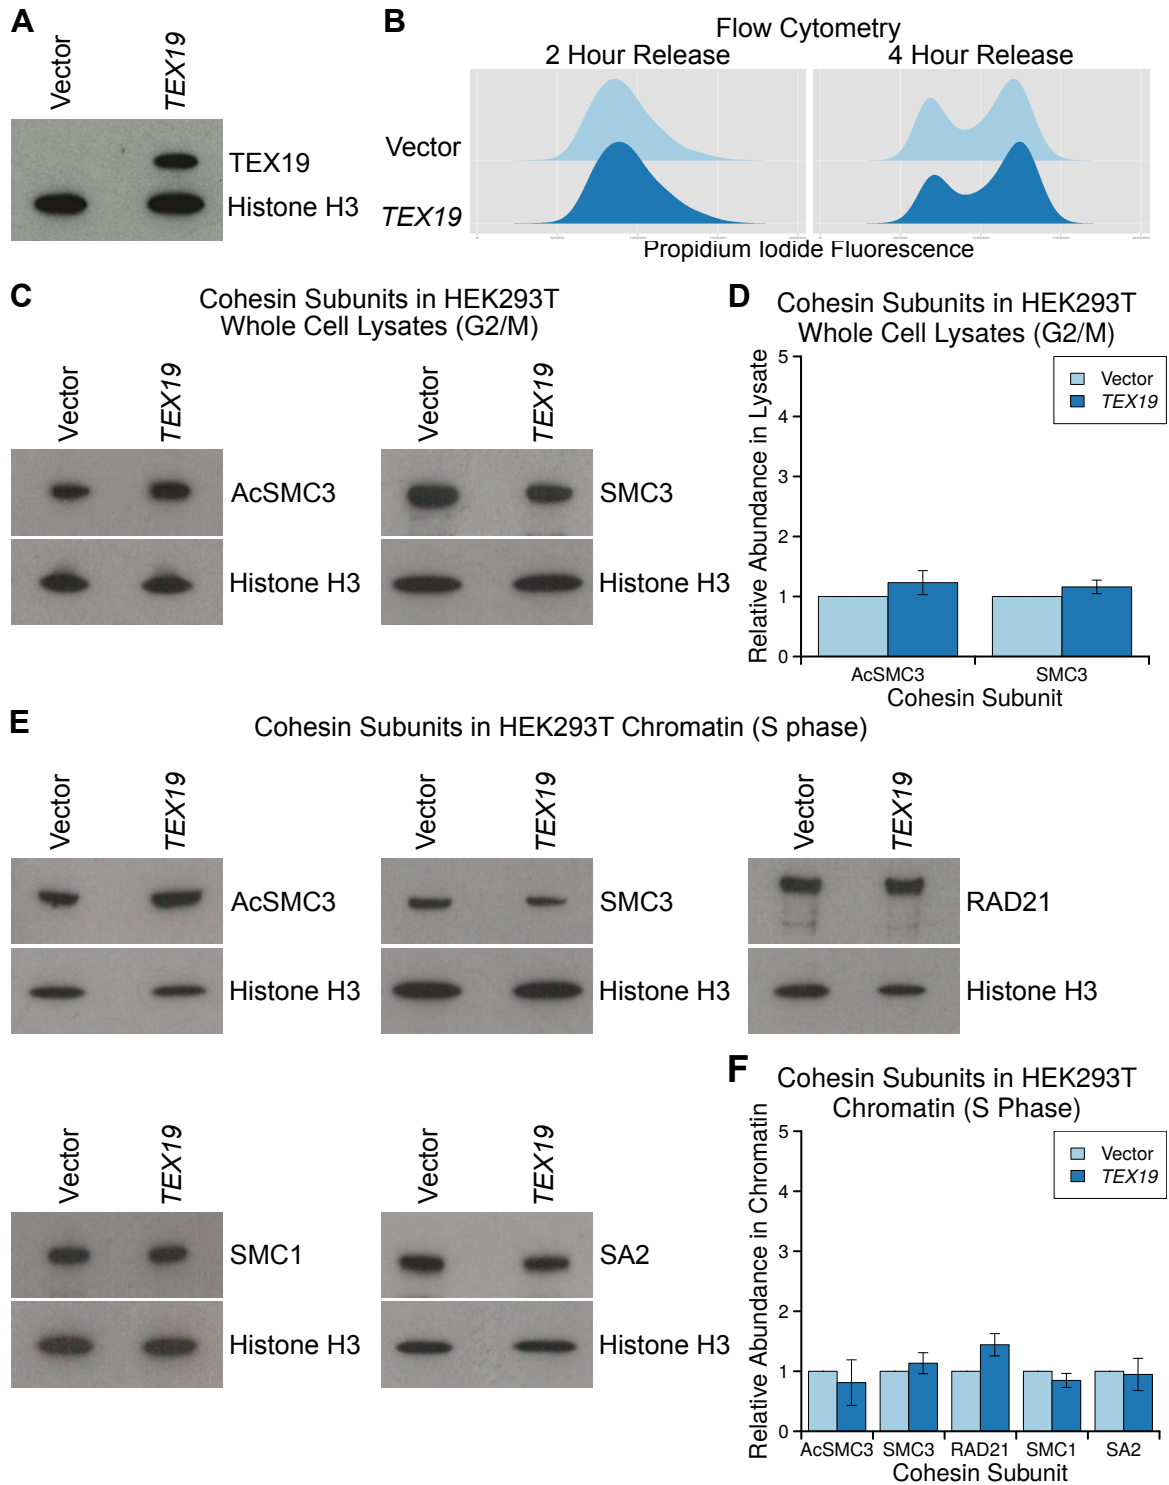

## Supplementary Figure S5

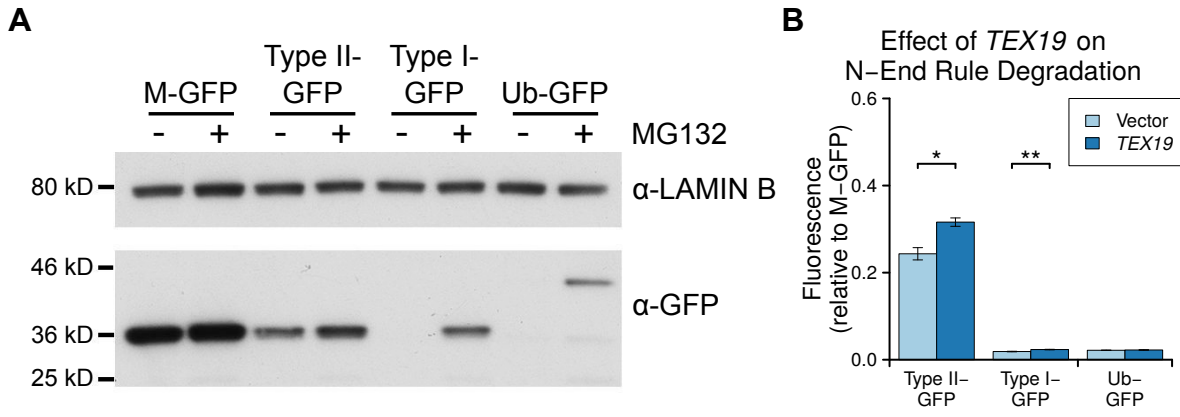

## Supplementary Figure S6

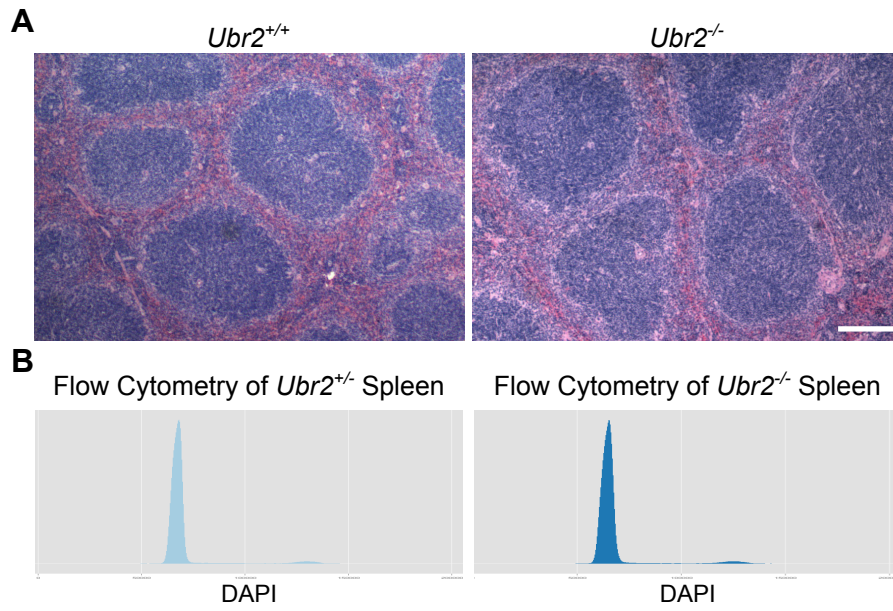

## Supplementary Figure S7

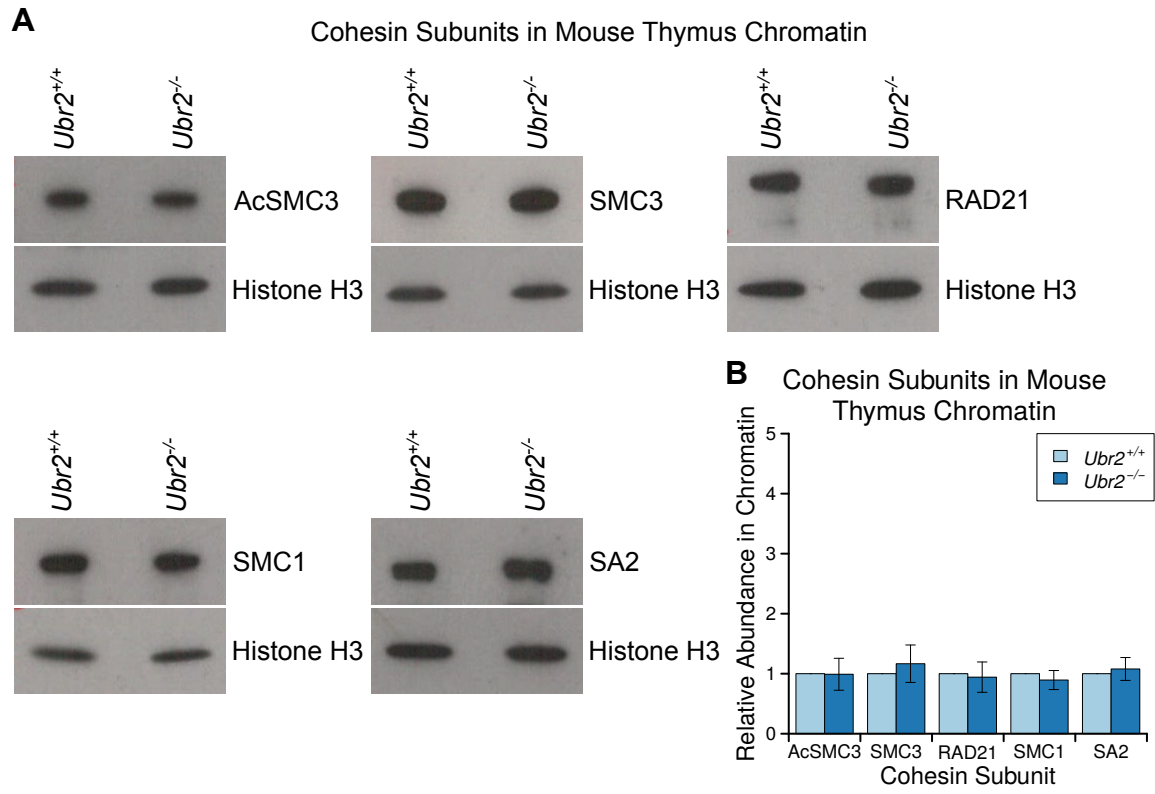

Source: http://www.biorxiv.org/content/10.1101/102285v1.full.pdf
